# Supplementary material for: n-Tuples on Scaffold Diversity Inspired by Drug Hybridisation to Enhance Drugability: Application to Cytarabine
Source: MDPI journal article supplement (doi:10.3390/md21120637), 2023-12-13
Supplement: s1 [file s1]

**Figure S1. MOLECULAR PROPERTIES OF 17-DUPLES AND LIPINSKI RULES OF FIVE (Ro5) OR BEYOND RULES OF FIVE (bRo5).**

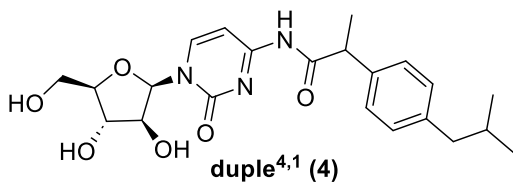

Chemical Formula: C<sub>22</sub>H<sub>29</sub>N<sub>3</sub>O<sub>6</sub>  
Molecular Weight: 431,4890  
tPSA: 131.69  
CLogP: 1.76745  
LogS: -3.043

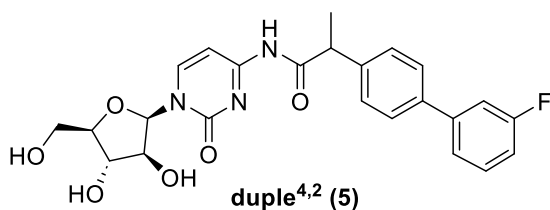

Chemical Formula: C<sub>24</sub>H<sub>24</sub>FN<sub>3</sub>O<sub>6</sub>  
Molecular Weight: 469,4694  
tPSA: 131.69  
CLogP: 1.84245  
LogS: -3.852

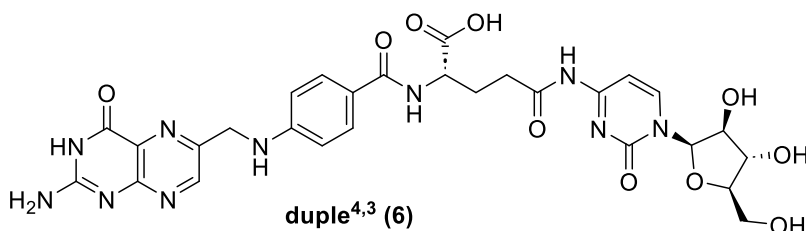

Chemical Formula: C<sub>28</sub>H<sub>30</sub>N<sub>10</sub>O<sub>10</sub>  
Molecular Weight: 666,6080  
tPSA: 302.32  
CLogP: -4.21765  
LogS: -4.12

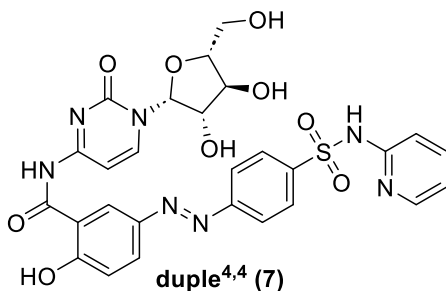

Chemical Formula: C<sub>27</sub>H<sub>25</sub>N<sub>7</sub>O<sub>9</sub>S  
Molecular Weight: 623,5970  
tPSA: 235.17  
CLogP: 1.86609  
LogS: -6.135

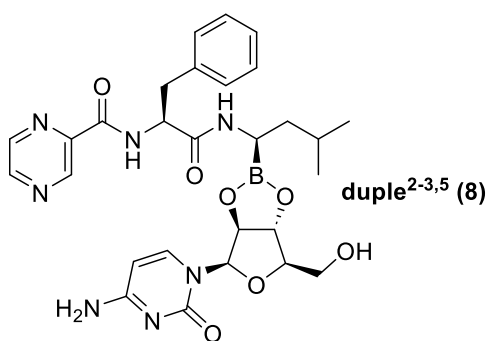

Chemical Formula: C<sub>28</sub>H<sub>34</sub>BN<sub>7</sub>O<sub>7</sub>  
Molecular Weight: 591,4320  
tPSA: 189.53  
CLogP: 0.48151  
LogS: -4.922

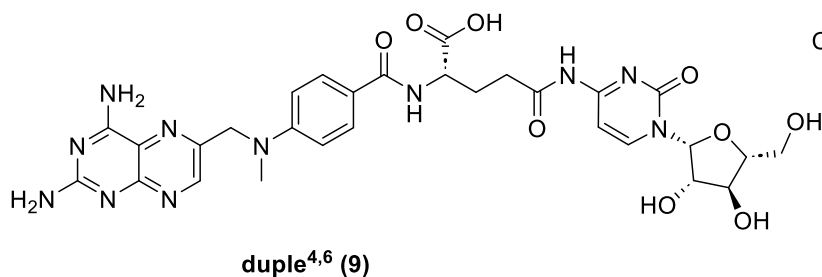

Chemical Formula: C<sub>29</sub>H<sub>33</sub>N<sub>11</sub>O<sub>9</sub>  
Molecular Weight: 679,6510  
tPSA: 302.81  
CLogP: -2.37076  
LogS: -4.374

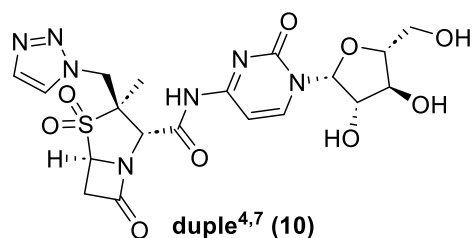

Chemical Formula: C<sub>19</sub>H<sub>23</sub>N<sub>7</sub>O<sub>9</sub>S  
Molecular Weight: 525,4930  
tPSA: 214.1  
CLogP: -2.51505  
LogS: -0.5855

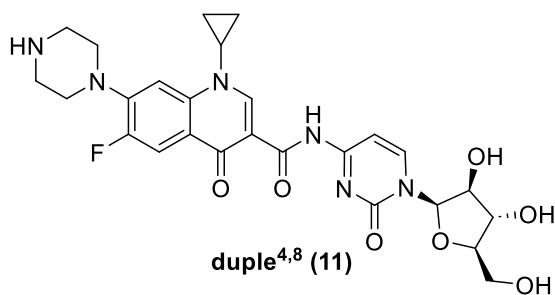

Chemical Formula: C<sub>26</sub>H<sub>29</sub>FN<sub>6</sub>O<sub>7</sub>  
Molecular Weight: 556,5514  
tPSA: 167.27  
CLogP: -1.46322  
LogS: -3.589

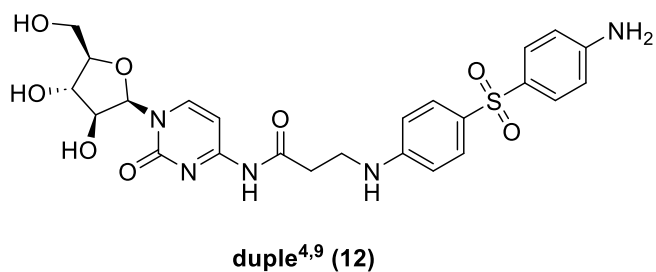

Chemical Formula: C<sub>24</sub>H<sub>27</sub>N<sub>5</sub>O<sub>8</sub>S  
Molecular Weight: 545,5670  
tPSA: 203.88  
CLogP: -0.401151  
LogS: -3.213

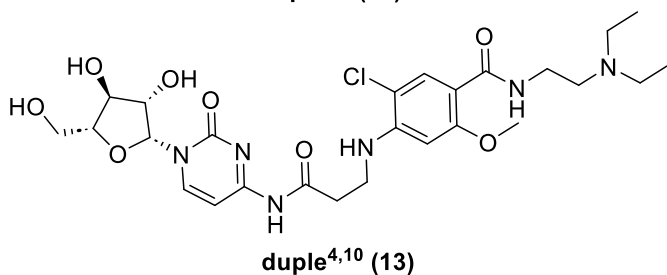

Chemical Formula: C<sub>26</sub>H<sub>37</sub>ClN<sub>6</sub>O<sub>8</sub>  
Molecular Weight: 597,0660  
tPSA: 185.29  
CLogP: 0.921321  
LogS: -3.292

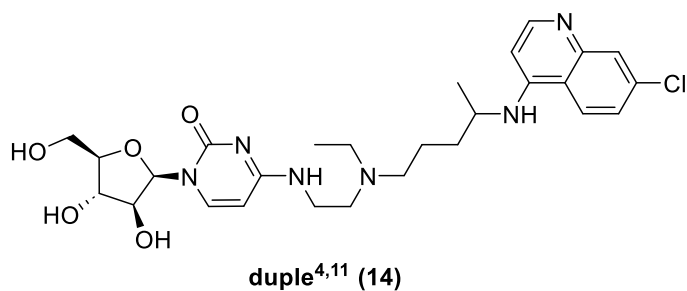

Chemical Formula: C<sub>27</sub>H<sub>37</sub>ClN<sub>6</sub>O<sub>5</sub>  
Molecular Weight: 561,0800  
tPSA: 142.25  
CLogP: 3.33853  
LogS: -4.18

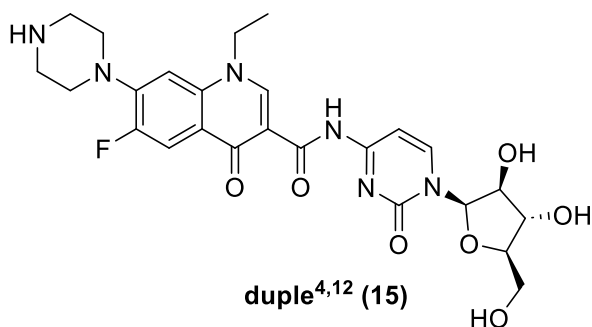

Chemical Formula: C<sub>25</sub>H<sub>29</sub>FN<sub>6</sub>O<sub>7</sub>  
Molecular Weight: 544,5404  
tPSA: 167.27  
CLogP: -1.51822  
LogS: -3.393

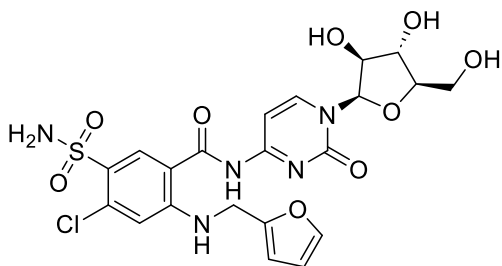

**duple<sup>4,13</sup> (16)**

Chemical Formula: C<sub>21</sub>H<sub>22</sub>ClN<sub>5</sub>O<sub>9</sub>S  
 Molecular Weight: 555,9430  
 tPSA: 213.11  
 CLogP: -0.791156  
 CMR: 12.9031  
 LogS: -3.496

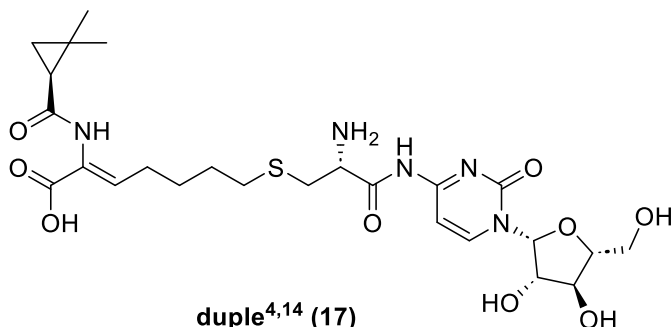

**duple<sup>4,14</sup> (17)**

Chemical Formula: C<sub>25</sub>H<sub>37</sub>N<sub>5</sub>O<sub>9</sub>S  
 Molecular Weight: 583,6570  
 tPSA: 224.11  
 CLogP: -2.24005  
 LogS: -2.637

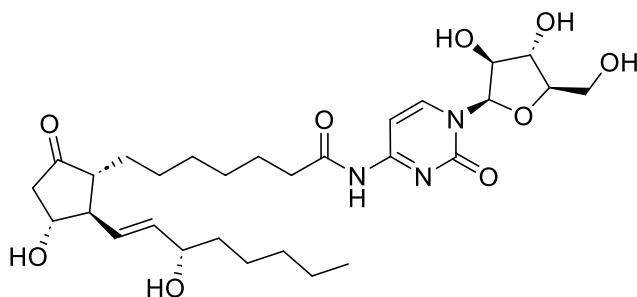

**duple<sup>4,15</sup> (18)**

Chemical Formula: C<sub>29</sub>H<sub>45</sub>N<sub>3</sub>O<sub>9</sub>  
 Molecular Weight: 579,6910  
 tPSA: 189.22  
 CLogP: 0.655847  
 LogS: -3.12

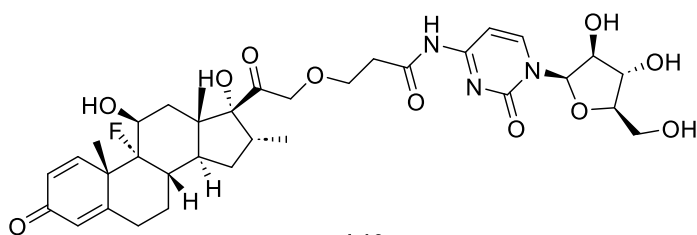

**duple<sup>4,16</sup> (19)**

Chemical Formula: C<sub>34</sub>H<sub>44</sub>FN<sub>3</sub>O<sub>11</sub>  
 Molecular Weight: 689,7344  
 tPSA: 215.52  
 CLogP: 0.207049  
 LogS: -2.522

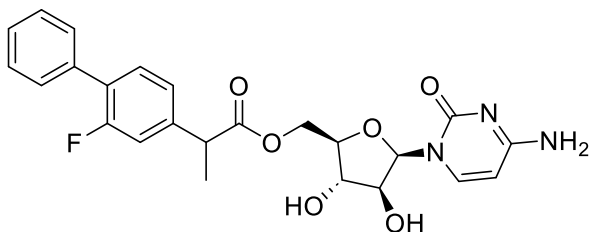

**duple<sup>1,2</sup> (23)**

Chemical Formula: C<sub>24</sub>H<sub>24</sub>FN<sub>3</sub>O<sub>6</sub>  
 Molecular Weight: 469,4694  
 tPSA: 134.68  
 CLogP: 2.01305  
 LogS: -4.307

**Figure S2.** DFT Minimized-3D structure for duple<sup>2-3,5</sup> (compound 8).

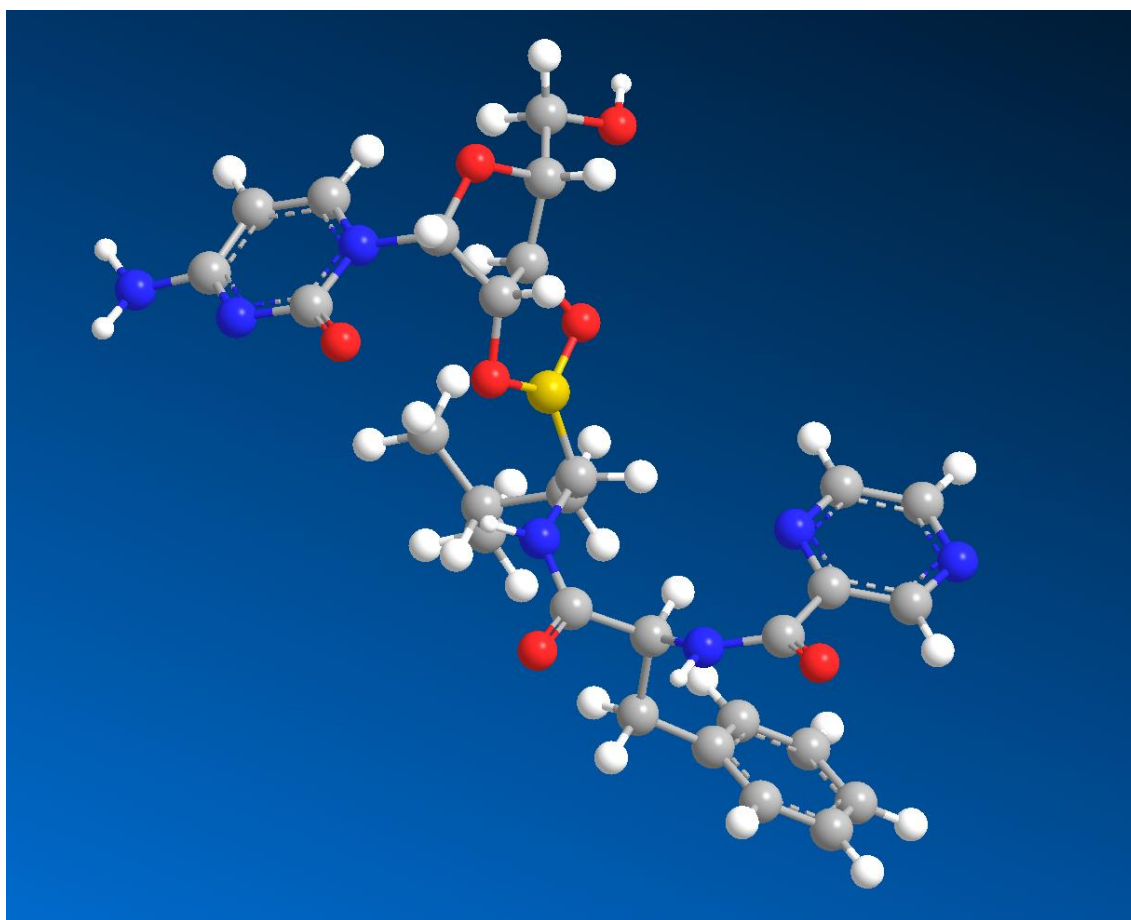

Calculation Type = FREQ  
Calculation Method = RB3LYP  
Basis Set = 6-31G(d)  
Charge = 0  
Spin = Singlet  
Solvation = None  
E(RB3LYP) = -2022.2077 Hartree  
RMS Gradient Norm = 3.921e-06 Hartree/Bohr  
Imaginary Freq = 0  
Dipole Moment = 13.590484 Debye  
Polarizability (?) = 352.57494 a.u.  
Point Group = C1  
Job cpu time: 0 days 16 hours 12 minutes 5.3 seconds.

Thermo Tab Data Section:  
Imaginary Freq = 0  
Temperature = 298.15 Kelvin  
Pressure = 1 atm  
Frequencies scaled by = 1  
Electronic Energy (EE) = -2022.2077 Hartree  
Zero-point Energy Correction = 0.624909 Hartree  
Thermal Correction to Energy = 0.665292 Hartree  
Thermal Correction to Enthalpy = 0.666237 Hartree  
Thermal Correction to Free Energy = 0.544252 Hartree  
EE + Zero-point Energy = -2021.5827 Hartree  
EE + Thermal Energy Correction = -2021.5424 Hartree

EE + Thermal Enthalpy Correction = -2021.5414 Hartree  
 EE + Thermal Free Energy Correction = -2021.6634 Hartree  
 E (Thermal) = 417.477 kcal/mol  
 Heat Capacity (Cv) = 152.333 cal/mol-kelvin  
 Entropy (S) = 256.739 cal/mol-kelvin

Opt Tab Data Section:

Step number = 1

Maximum force = 1.5e-05 Converged

RMS force = 3e-06 Converged

Maximum displacement = 0.003079 Not converged

RMS displacement = 0.000622 Converged

Predicted energy change = -1.994309e-08 Hartree

## Principal Moments of Inertia (PMI)<sup>1</sup> of 16-duples

**Table S1. PMI for duples<sup>4,X</sup>**

|                        | npr1        | npr2        | pmi1        | pmi2         | pmi3         |
|------------------------|-------------|-------------|-------------|--------------|--------------|
| Duple <sup>4,12</sup>  | 0.072317605 | 0.981846756 | 1596.575    | 21676.492000 | 22077.266000 |
| Duple <sup>4,11</sup>  | 0.052838474 | 0.99045677  | 2046.521000 | 38362.020000 | 38731.645000 |
| Duple <sup>4,16</sup>  | 0.190472267 | 0.941045138 | 1581224.000 | 7812177.500  | 8301597.000  |
| Duple <sup>4,13</sup>  | 0.221238695 | 0.828878583 | 3623.775    | 13576.601    | 16379.481    |
| Duple <sup>4,9</sup>   | 0.170879688 | 0.914837037 | 3371.237    | 18048.561    | 19728.717    |
| Duple <sup>4,15</sup>  | 0.057862444 | 0.982970809 | 2021.1840   | 34336.0000   | 34930.8440   |
| Duple <sup>4,6</sup>   | 0.242322343 | 0.859005736 | 1932637.125 | 6850983.500  | 7975480.500  |
| Duple <sup>2-3,5</sup> | 0.261535858 | 0.923215089 | 3992.002    | 14091.668    | 15263.689    |
| Duple <sup>4,4</sup>   | 0.191208522 | 0.905227895 | 4453.496    | 21083.939    | 23291.305    |
| Duple <sup>4,3</sup>   | 0.131935755 | 0.926877323 | 1609414.75  | 11306488     | 12198473     |
| RibuprofenfreeAmino    | 0.201922861 | 0.930053209 | 655346.25   | 3018513.5    | 3245527.75   |
| Sibuprofeneamino       | 0.198352023 | 0.926533983 | 656148.938  | 3064976.5    | 3308002.25   |
| Rflurbiprofenamino     | 0.210356292 | 0.922913753 | 799741.438  | 3508772.5    | 3801842.25   |
| Sflurbiprofenamino     | 0.202324239 | 0.924860144 | 789009.5    | 3606703      | 3899728      |
| Duple <sup>4,7</sup>   | 0.359543168 | 0.905607534 | 938849.188  | 2364747.75   | 2611228.000  |
| Duple <sup>4,8</sup>   | 0.130867878 | 0.979649372 | 786703.875  | 5889099.5    | 6011436      |
| Duple <sup>4,10</sup>  | 0.076850244 | 0.954779739 | 2421.751    | 30087.592    | 31512.6      |
| Duple <sup>4,14</sup>  | 0.18426677  | 0.901395335 | 1414775.75  | 6920793.5    | 7677867      |

**Table S2. PMI for duples<sup>1,X</sup>**

|                       | npr1        | npr2        | pmi1        | pmi2      | pmi3      |
|-----------------------|-------------|-------------|-------------|-----------|-----------|
| Duple <sup>1,12</sup> | 0.131189    | 0.974602221 | 716168.625  | 5320412   | 5459060   |
| Duple <sup>1,11</sup> | 0.094381886 | 0.989377395 | 1102087     | 11552852  | 11676891  |
| Duple <sup>1,16</sup> | 0.169961858 | 0.996059803 | 993192      | 5820592   | 5843617   |
| Duple <sup>1,13</sup> | 0.291488331 | 0.847888421 | 3201.082    | 9311.386  | 10981.853 |
| Duple <sup>1,9</sup>  | 0.225429658 | 0.903249226 | 2811.916    | 11266.756 | 12473.585 |
| Duple <sup>1,15</sup> | 0.145869099 | 0.9512397   | 1196168.625 | 7800439.5 | 8200288   |
| Duple <sup>1,6</sup>  | 0.139158421 | 0.95624094  | 1314083.125 | 9029853   | 9443073   |
| bortezomibester       | 0.261535858 | 0.923215089 | 3992.002    | 14091.668 | 15263.689 |

|                       |             |             |             |             |             |
|-----------------------|-------------|-------------|-------------|-------------|-------------|
| Duple <sup>1,4</sup>  | 0.159672232 | 0.939587112 | 1264298.625 | 7439732.5   | 7918087     |
| Duple <sup>1,3</sup>  | 0.138270068 | 0.929317797 | 1606510     | 10797408    | 11618639    |
| Ribufrofenfreeester   | 0.26769379  | 0.932272108 | 729241.25   | 2539660.25  | 2724162     |
| Sibuprofeneester      | 0.226273999 | 0.908404154 | 2064.96     | 8290.03     | 9125.927    |
| Rflurbiprofenester    | 0.163302512 | 0.971236807 | 632237.312  | 3760212.5   | 3871571.25  |
| Sflurbiprofenester    | 0.166984187 | 0.991155503 | 647570.188  | 3843733.75  | 3878033     |
| Duple <sup>1,7</sup>  | 0.343030887 | 0.815332365 | 3062.612    | 7279.364    | 8928.094    |
| Duple <sup>1,8</sup>  | 0.188349666 | 0.976963005 | 955349.250  | 4955362.500 | 5072211.000 |
| Duple <sup>1,10</sup> | 0.09257767  | 0.953688599 | 2775.393    | 28590.703   | 29979.076   |
| Duple <sup>1,14</sup> | 0.383331459 | 0.842973262 | 337341.531  | 741838.125  | 880025.688  |

**Table S3. PMI for commercial drugs**

|                      | npr1        | npr2        | pmi1          | pmi2           | pmi3           |
|----------------------|-------------|-------------|---------------|----------------|----------------|
| Norfloxacinfree      | 0.218224167 | 0.846860156 | 288414.688000 | 1119247.750000 | 1321644.125000 |
| HidroxycloquineLibre | 0.181298597 | 0.992009861 | 1059.319000   | 5796.266000    | 5842.952000    |
| DexametasoneLibre    | 0.211878055 | 0.925677164 | 1159.837000   | 5067.229000    | 5474.078000    |
| furosemidefree       | 0.394175725 | 0.832041701 | 1348.066000   | 2845.551000    | 3419.962000    |
| Dapsonfree           | 0.29399611  | 0.878031467 | 677.173000    | 2022.405000    | 2303.340000    |
| Alprostadilfree      | 0.320577985 | 0.717472868 | 2099.010000   | 4697.711000    | 6547.580000    |
| Methotrexatefree     | 0.264687255 | 0.826295562 | 2831.007000   | 8837.783000    | 10695.668000   |
| bortezomibfree       | 0.424072457 | 0.792847887 | 2561.566000   | 4789.116000    | 6040.397000    |
| sulfasalacinafree    | 0.088101191 | 0.955430922 | 907.890000    | 9845.794000    | 10305.082000   |
| FolicAcidFree        | 0.099554407 | 0.954589602 | 1440.457000   | 13811.998000   | 14469.043000   |
| Ribufrofenfree       | 0.145054325 | 0.971172397 | 315.181000    | 2110.210000    | 2172.848000    |
| SibuprofeneFree      | 0.175785488 | 0.957364901 | 368.590000    | 2007.419000    | 2096.817000    |
| Rflurbiprofenfree    | 0.15875572  | 0.953045334 | 455.751000    | 2735.973000    | 2870.769000    |
| sflurbiprofenfree    | 0.140805609 | 0.941823099 | 419.944000    | 2808.929000    | 2982.438000    |
| tazobactamfree       | 0.367629268 | 0.790484959 | 891.587000    | 1917.111000    | 2425.234000    |
| Ciprofloxacinfree    | 0.223213383 | 0.802823161 | 1101.898000   | 3963.155000    | 4936.523000    |
| Metoclopramidefree   | 0.214745468 | 0.883477672 | 855.605000    | 3520.018000    | 3984.275000    |
| Cillastatinfree      | 0.247704318 | 0.961978624 | 519943.625000 | 2019240.750000 | 2099049.500000 |

[1] PMI analysis was performed using Chembiooffice 3D software (v22.0.0.22). After minimization of energy using a Forcefield MMFF94; eps = r, Cutoff [8,10] and Gradient = 0.1 RMS Kcal/mol/A2. The principal moment of inertia and related calculations are performed in units of daltons (AMU) and angstroms. The stochastic conformational search algorithm in the Chem3D software package was used to generate 3D conformers for each compound. Sampling and minimization parameters were implemented as follows: Stochastic Search Limit: 7; Refinement Conformation Limit: 300; Stochastic

Search Failure Limit: 100; Stochastic Search Iteration Limit: 1000; Energy Minimization Iteration Limit: 200; Energy Minimization Gradient Test: 0.01. Normalized PMI ratios (I1/I3 and I2/I3) of these conformers were obtained from Chem3D and then plotted on a triangular graph, with the coordinates (0,1), (0.5,0.5) and (1,1) representing a perfect rod, disc and sphere respectively, according to reference 44 of the article.

## NMR Spectra

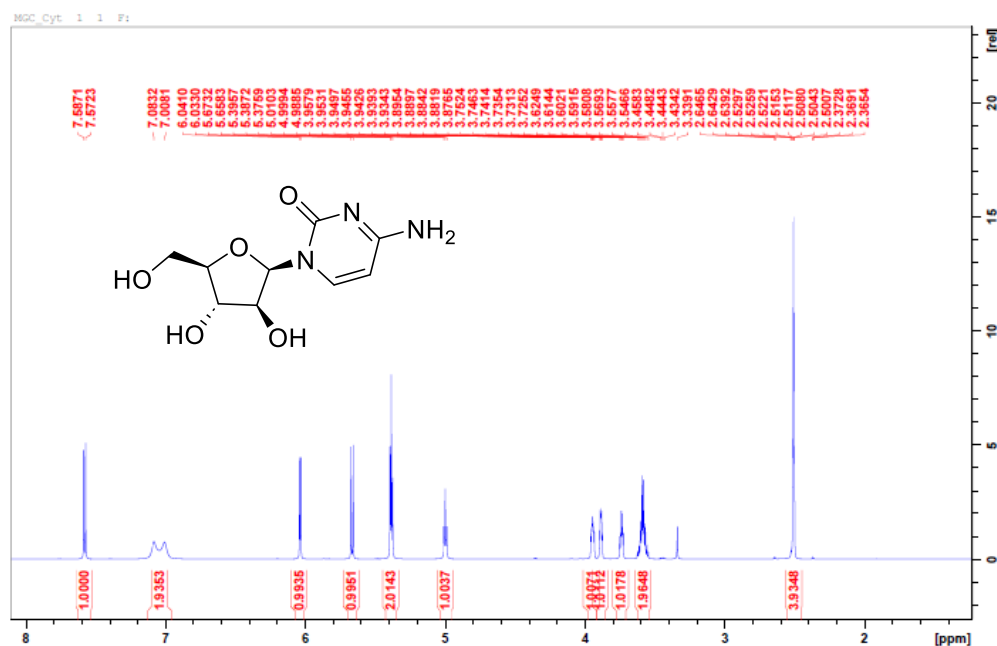<sup>1</sup>H-NMR (500 MHz, DMSO-d<sup>6</sup>) of Cytarabine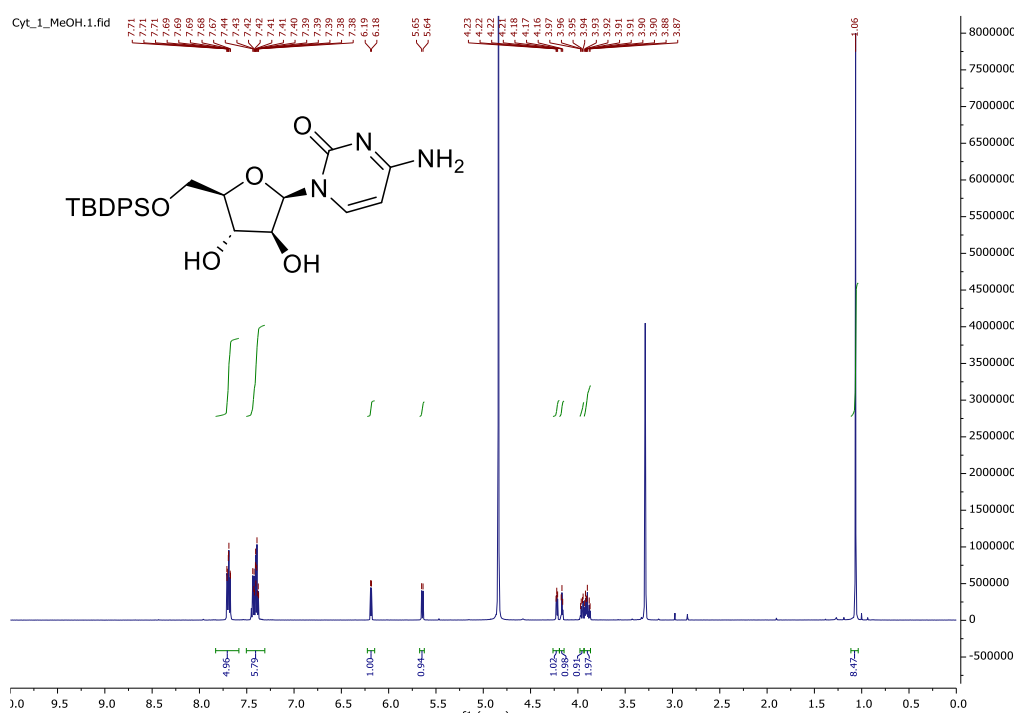<sup>1</sup>H-NMR (500 MHz, MeOD-*d*<sup>4</sup>) of intermediate **1** TPSO-Cyt

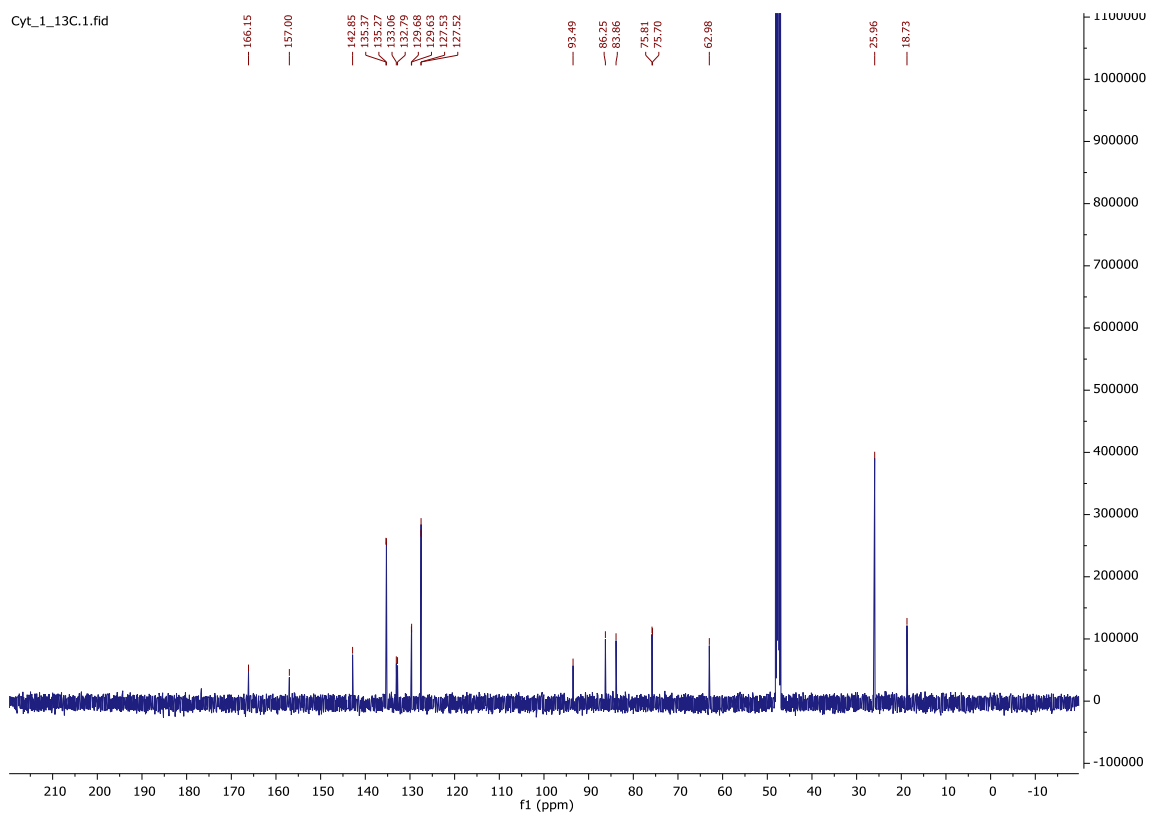

$^{13}\text{C}$ -NMR (125 MHz,  $\text{MeOD}-d_4$ ) of intermediate I TPSO-Cyt

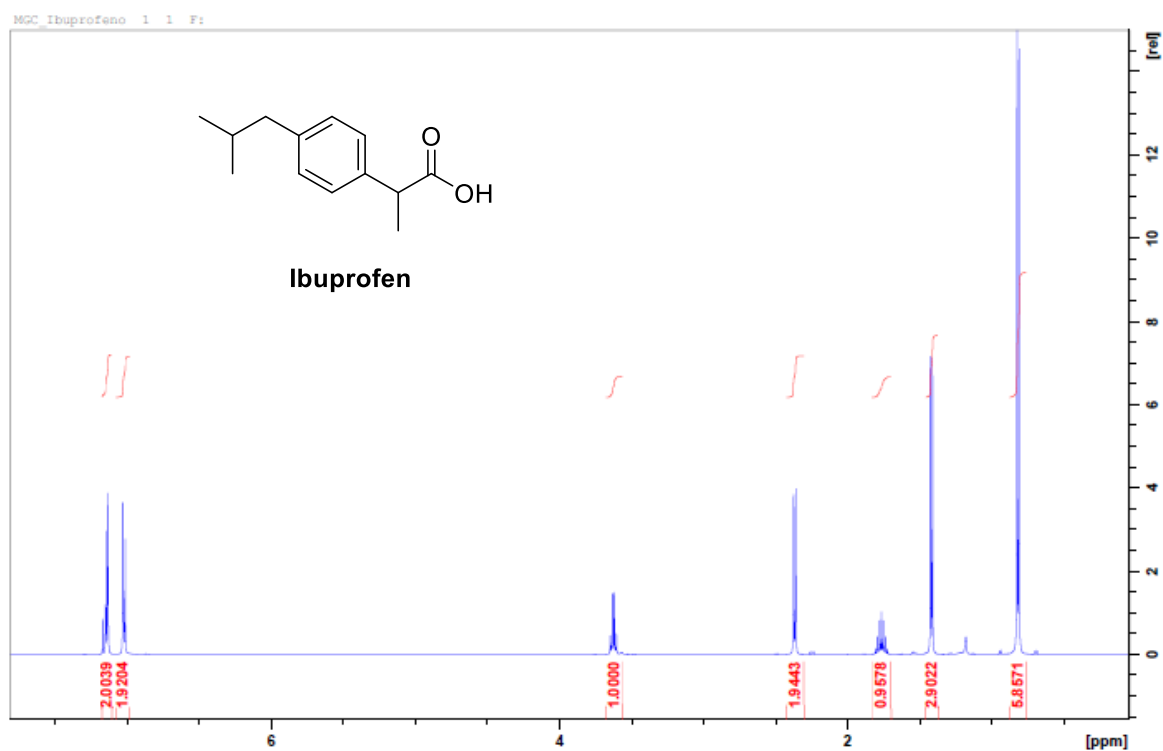

$^1\text{H}$ -NMR (500 MHz,  $\text{CDCl}_3$ ) of Ibuprofen



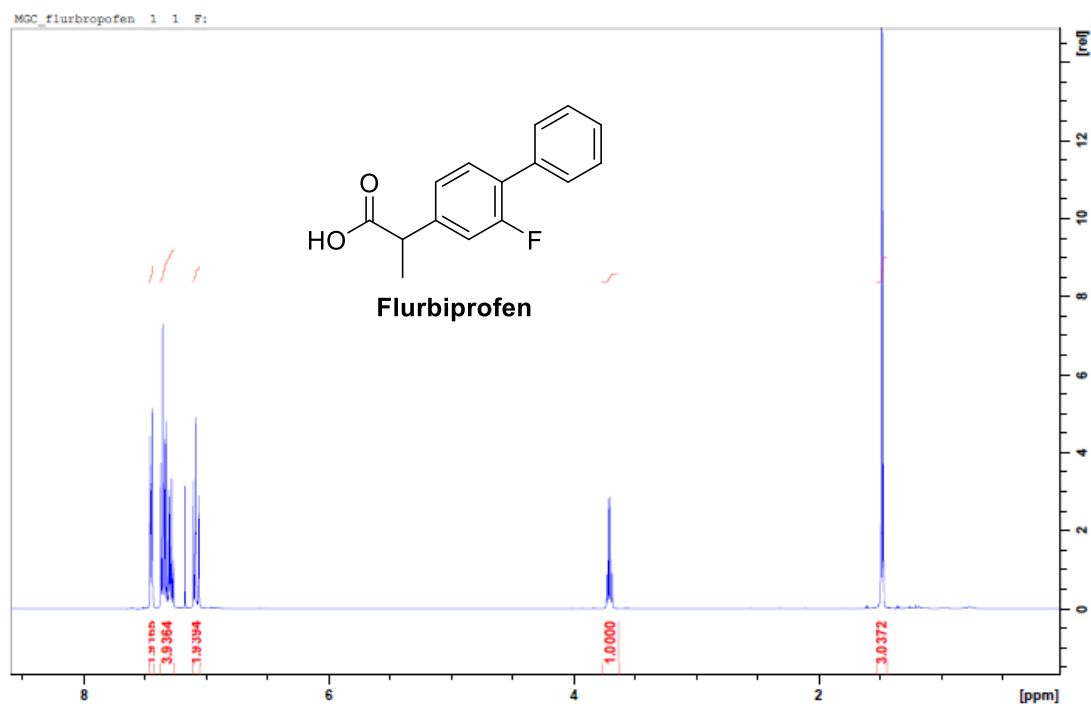

$^1\text{H}$ -NMR (500 MHz,  $\text{CDCl}_3$ ) of Flurbiprofen

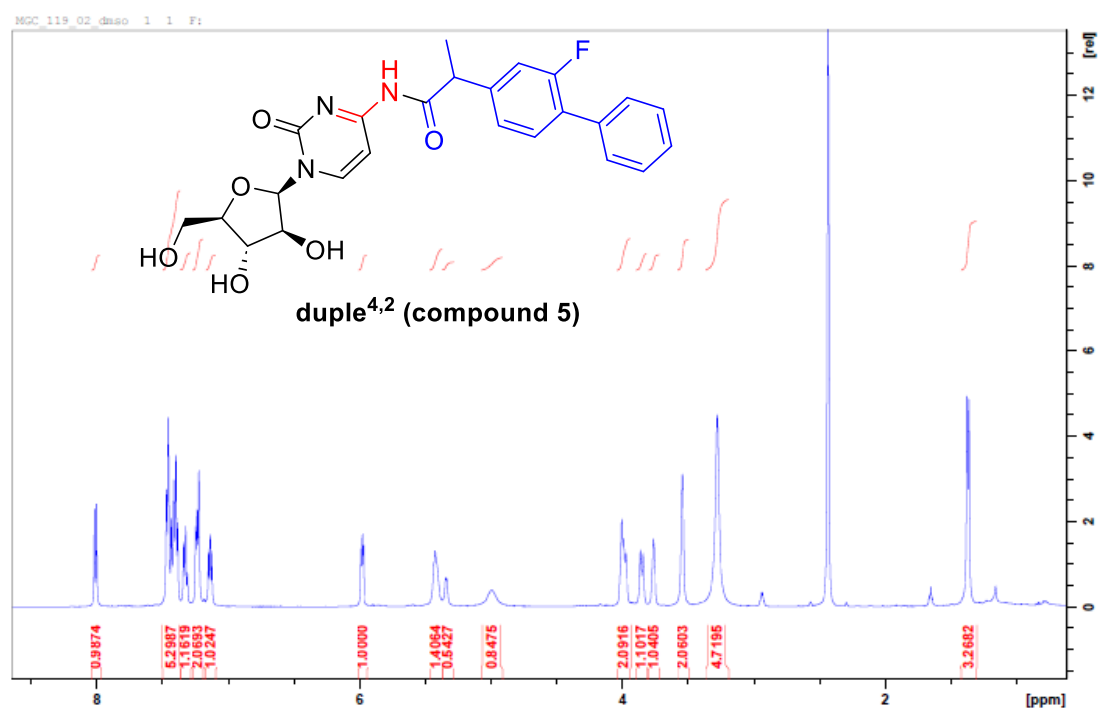

$^1\text{H}$ -NMR (500 MHz,  $\text{DMSO-d}_6$ ) of duple<sup>4,2</sup>

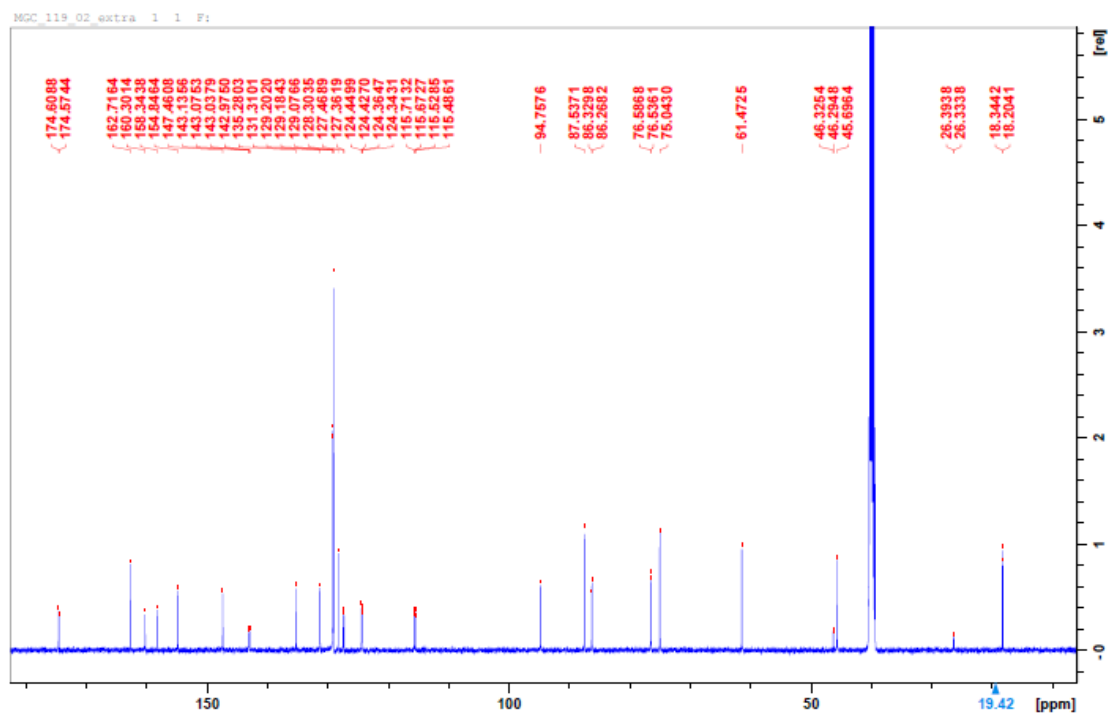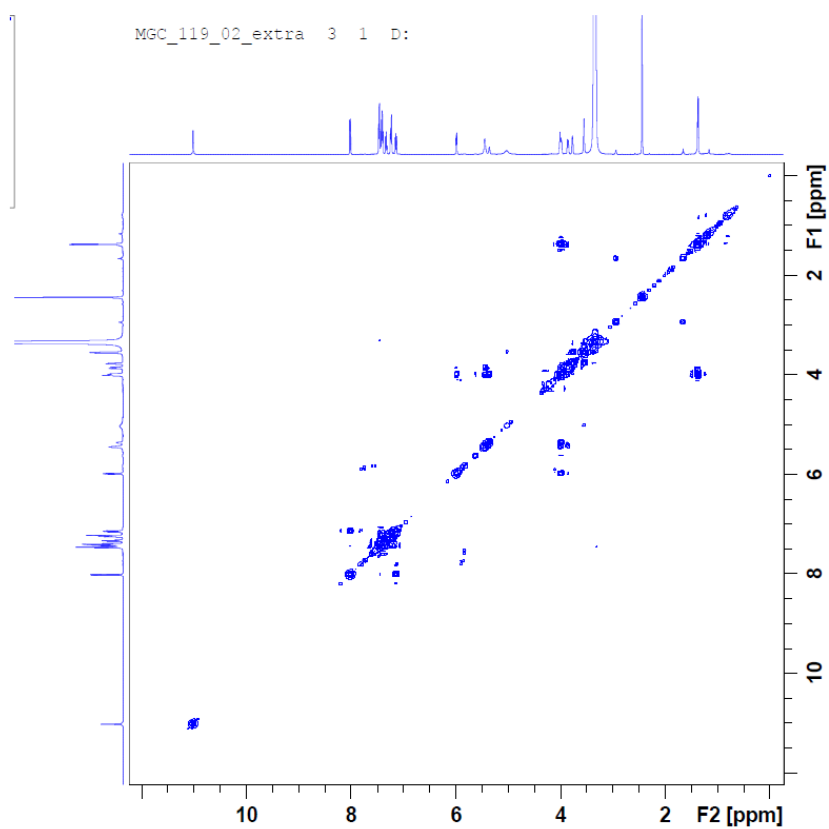

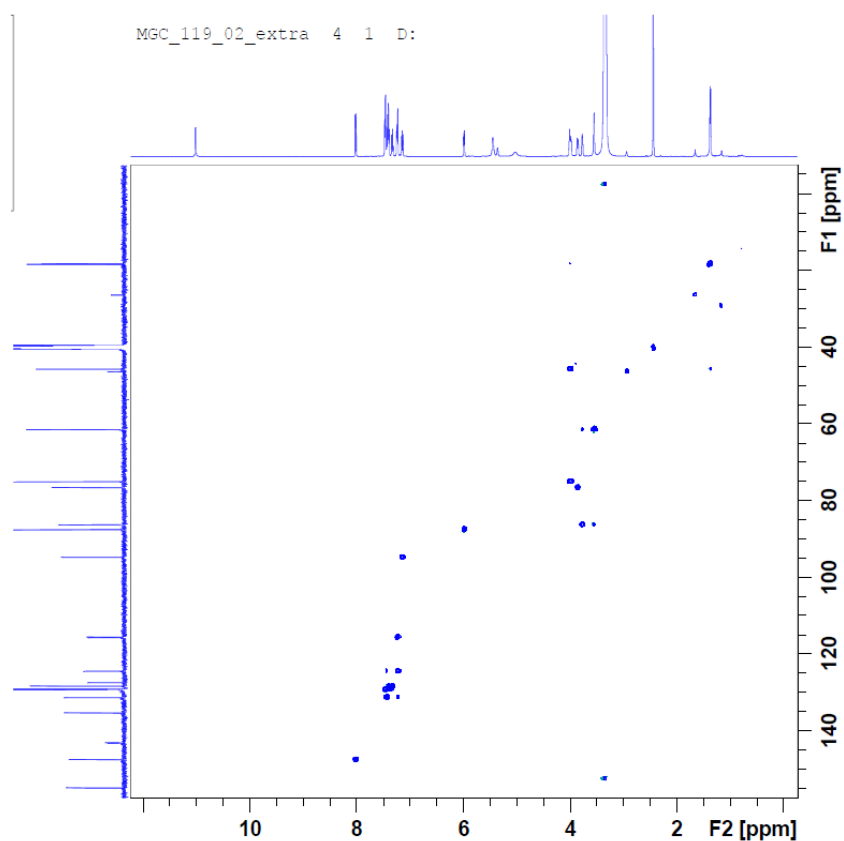

Bidimensional HSQC-experiment of duple<sup>4,2</sup>

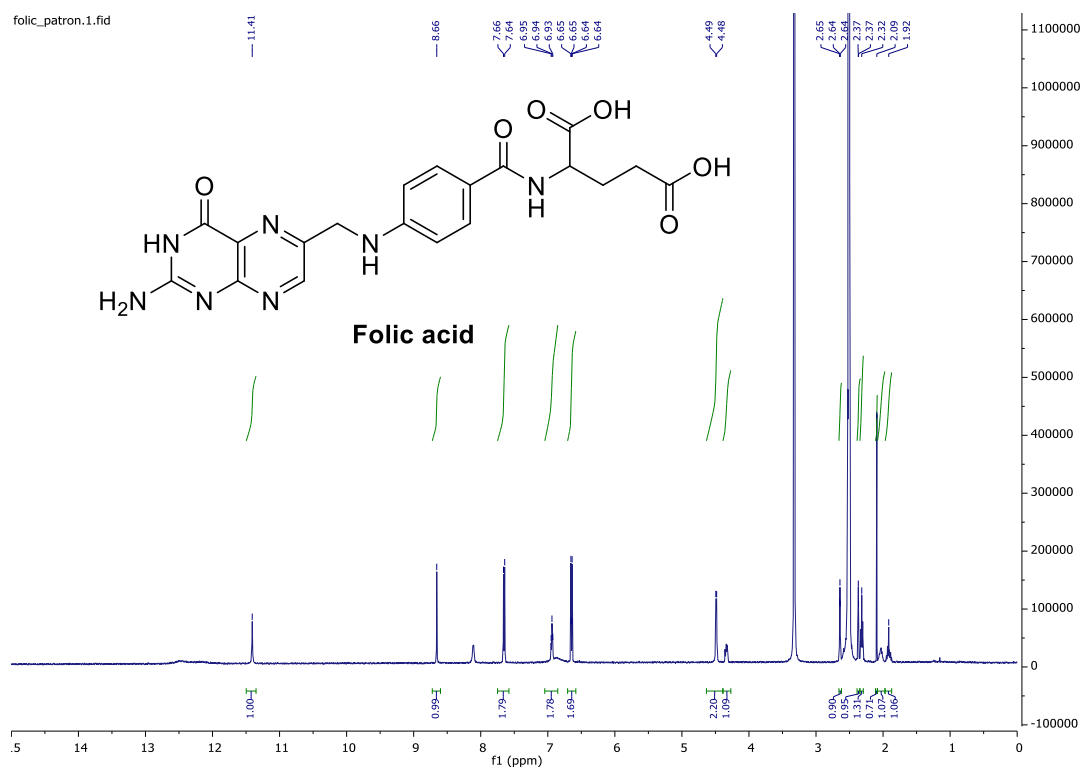

<sup>1</sup>H-NMR (500 MHz, DMSO-d<sub>6</sub>) of Folic acid

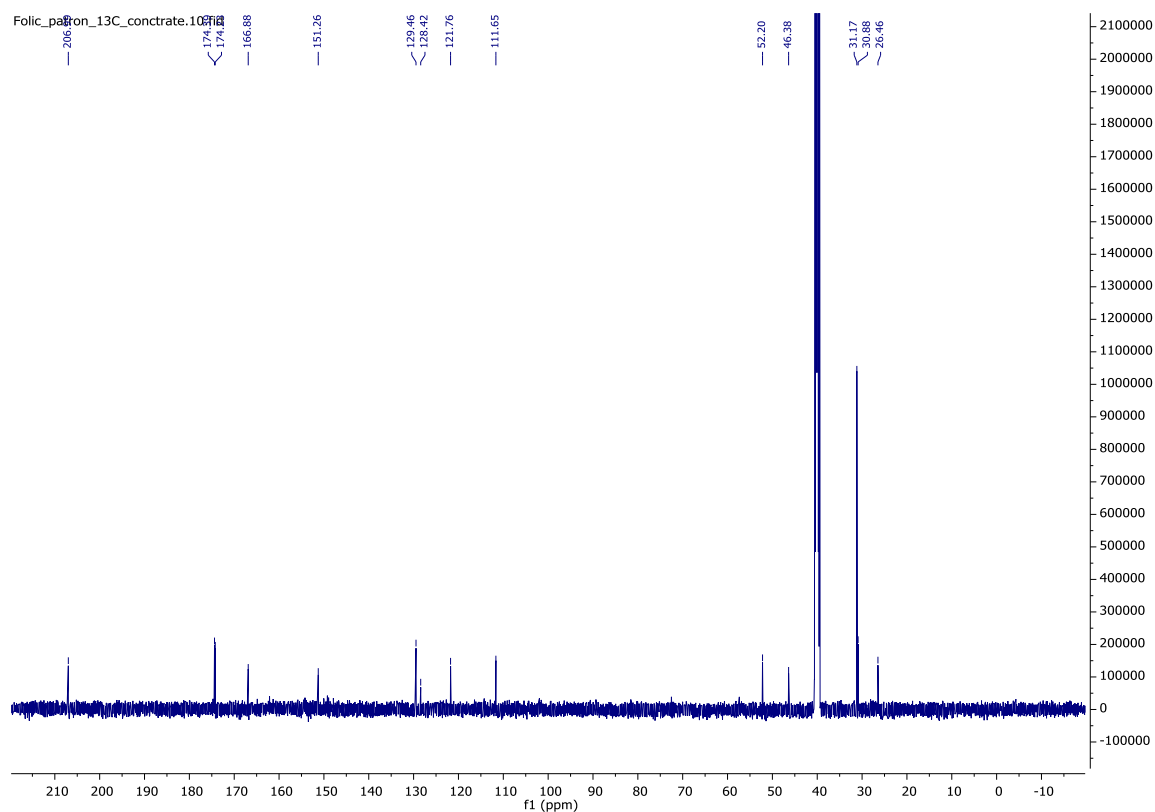

$^{13}\text{C}$ -NMR (125 MHz, DMSO- $\text{d}_6$ ) of Folic acid

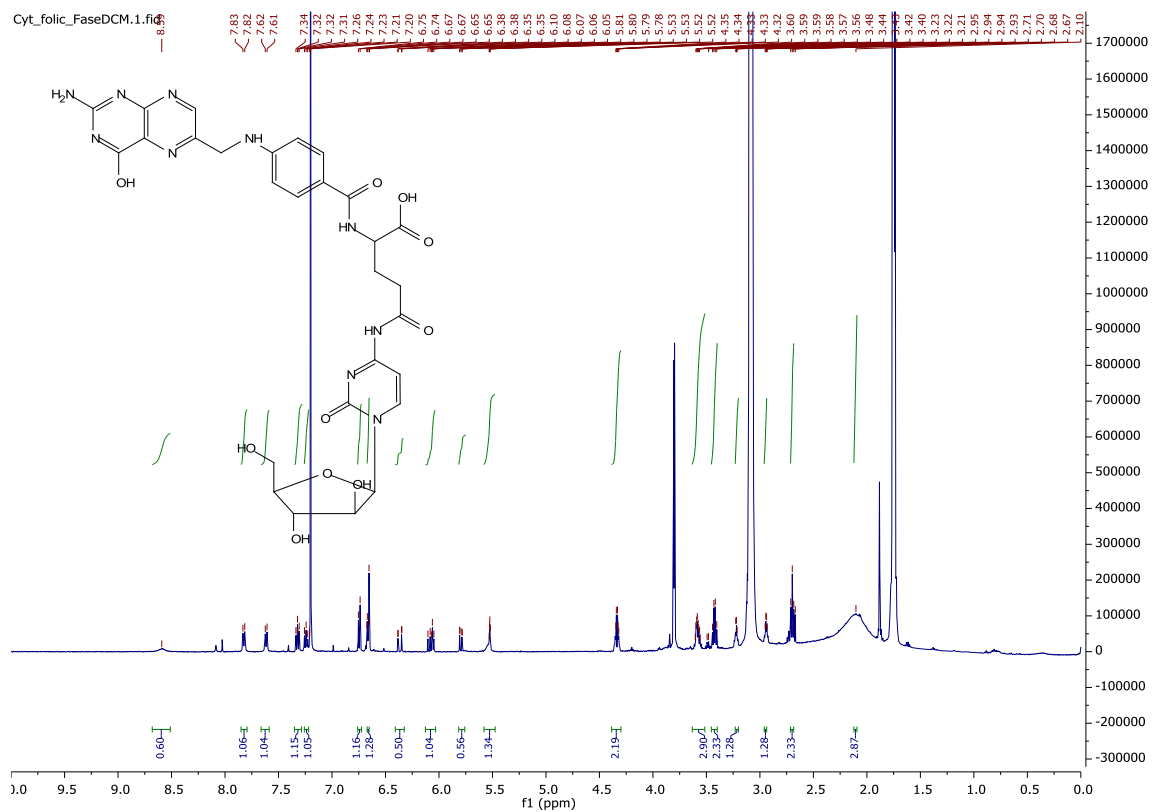

$^1\text{H}$ -NMR (500 MHz, DMSO- $\text{d}_6$ ) of duple<sup>4,3</sup>

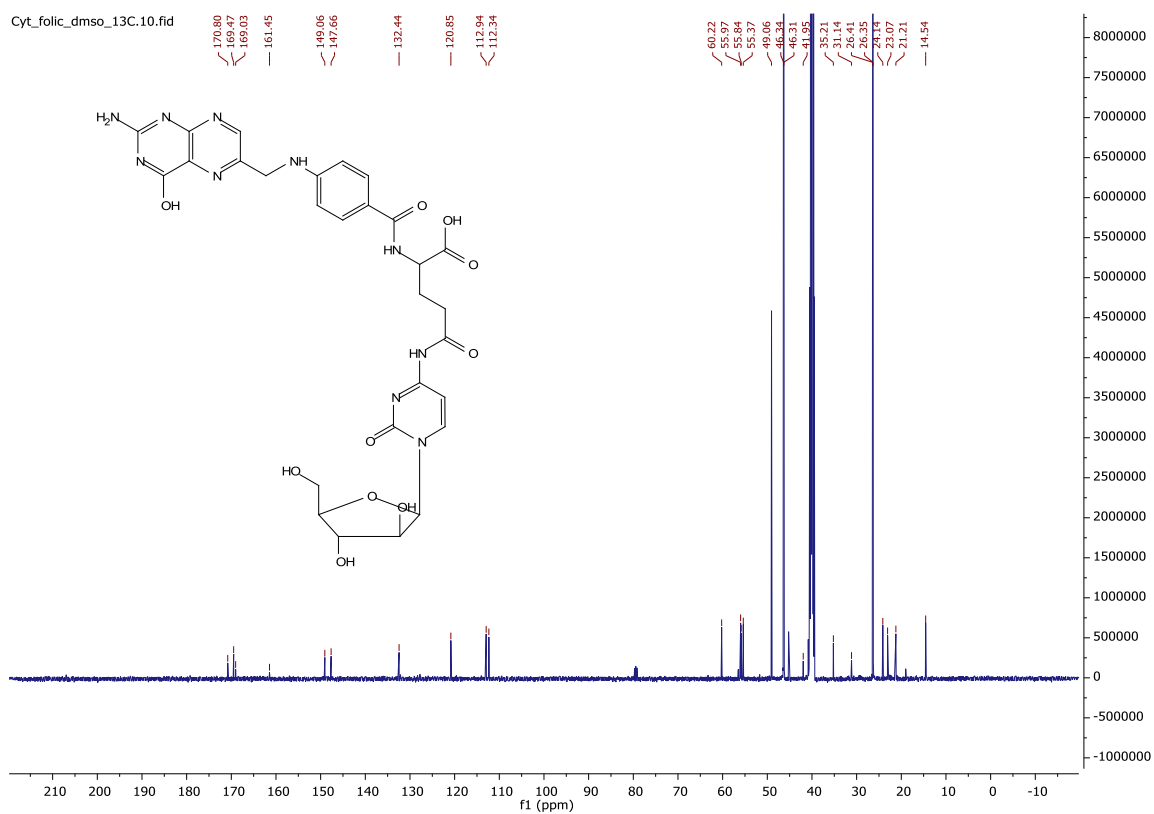

$^{13}\text{C}$ -NMR (125 MHz, DMSO- $\text{d}_6$ ) of duple<sup>4,3</sup>

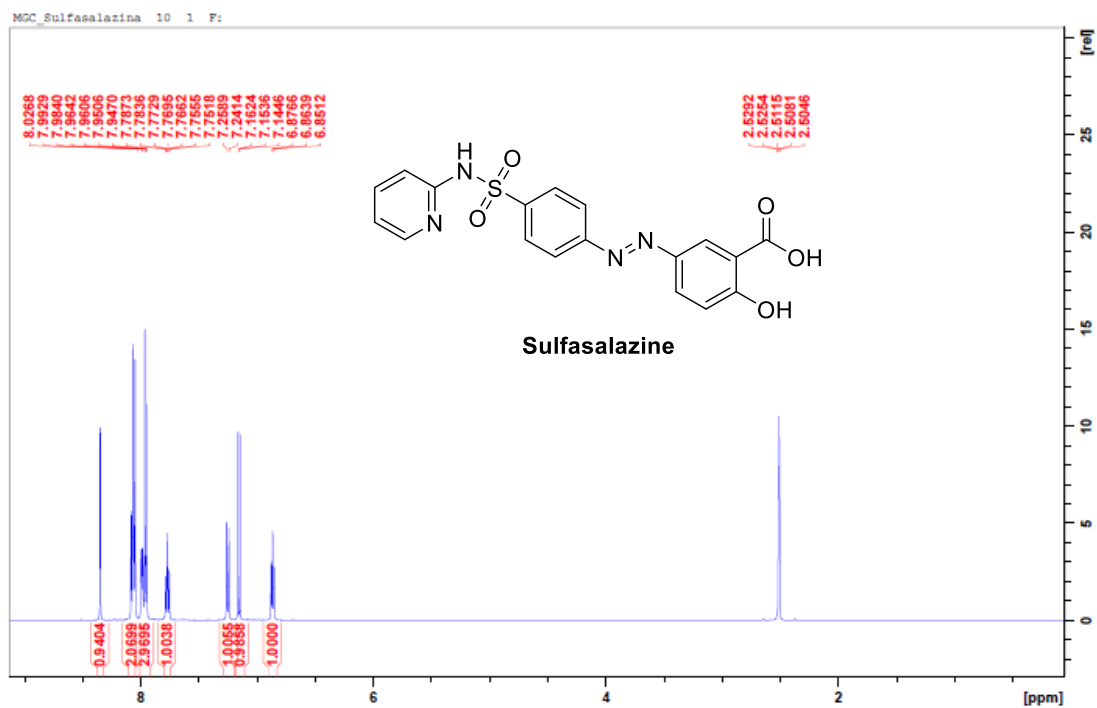

$^1\text{H}$ -NMR (500 MHz, DMSO- $\text{d}_6$ ) of Sulfasalazine

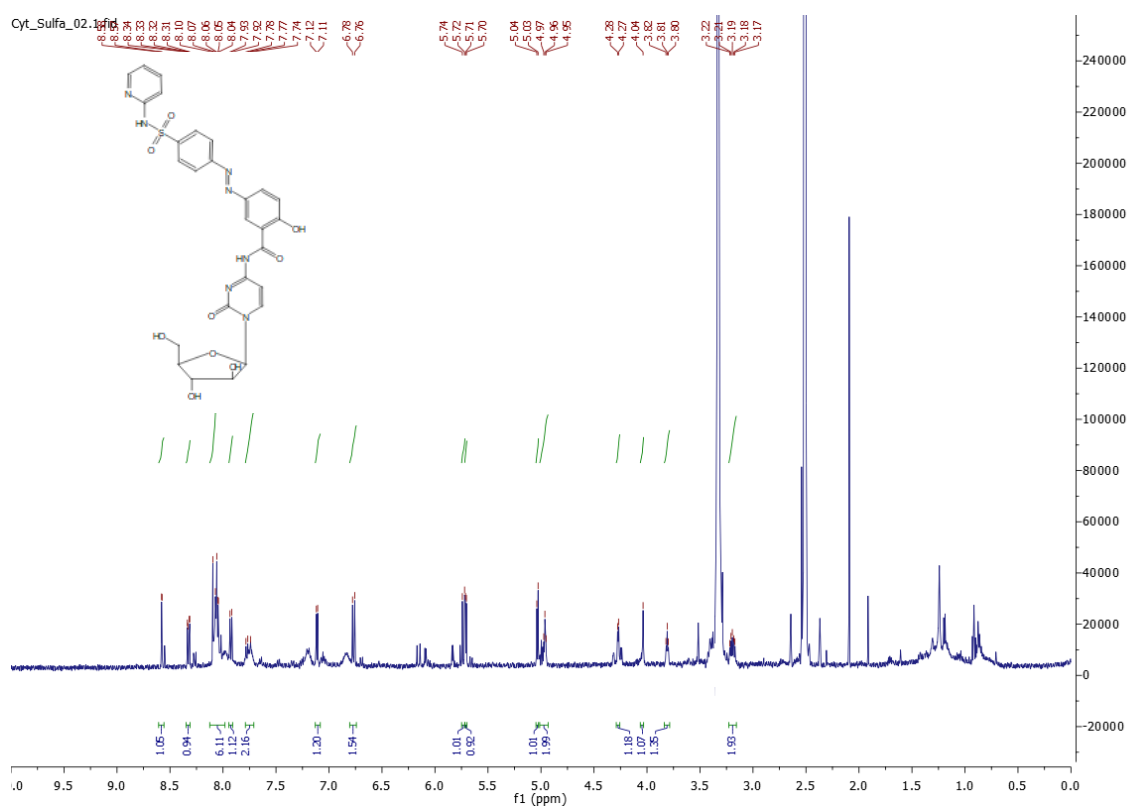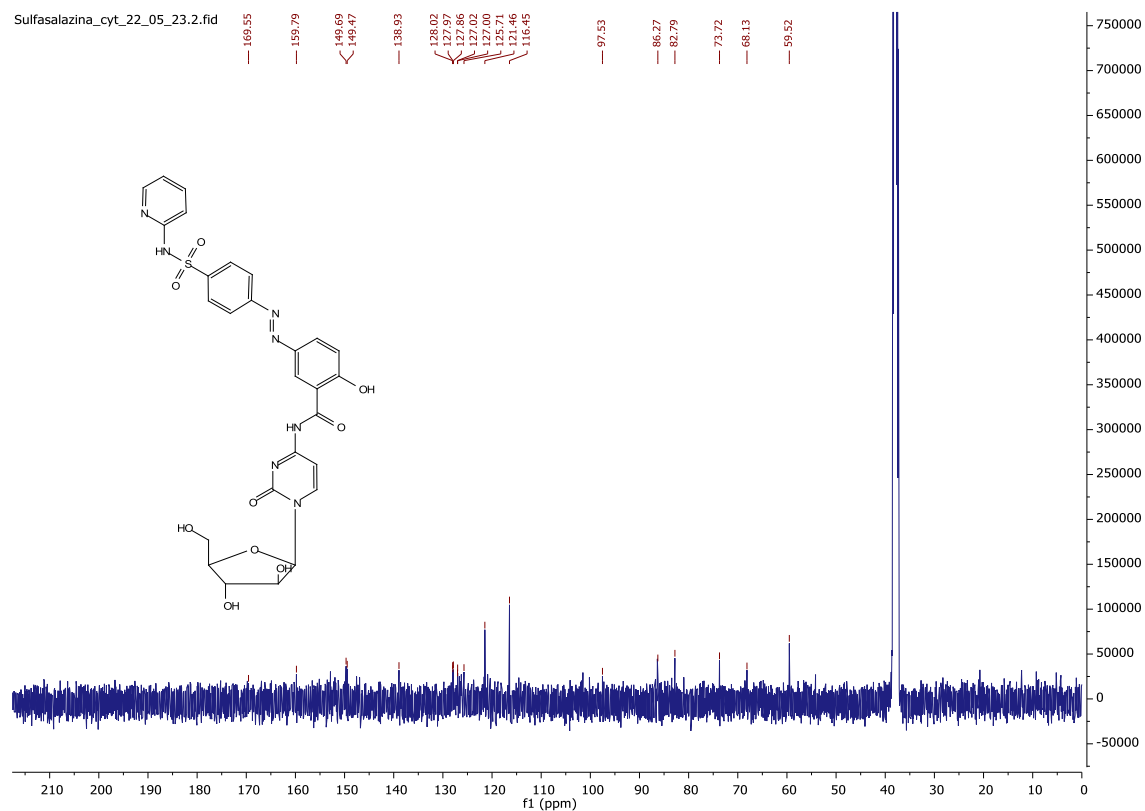

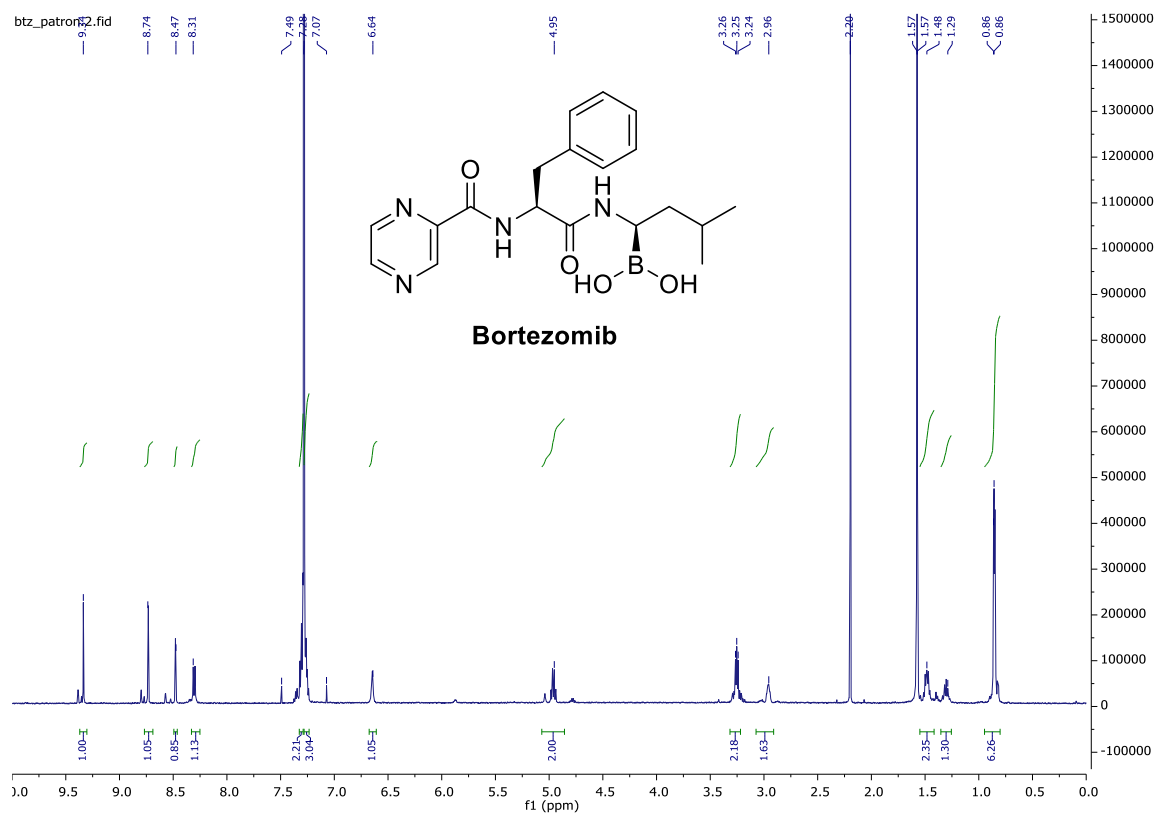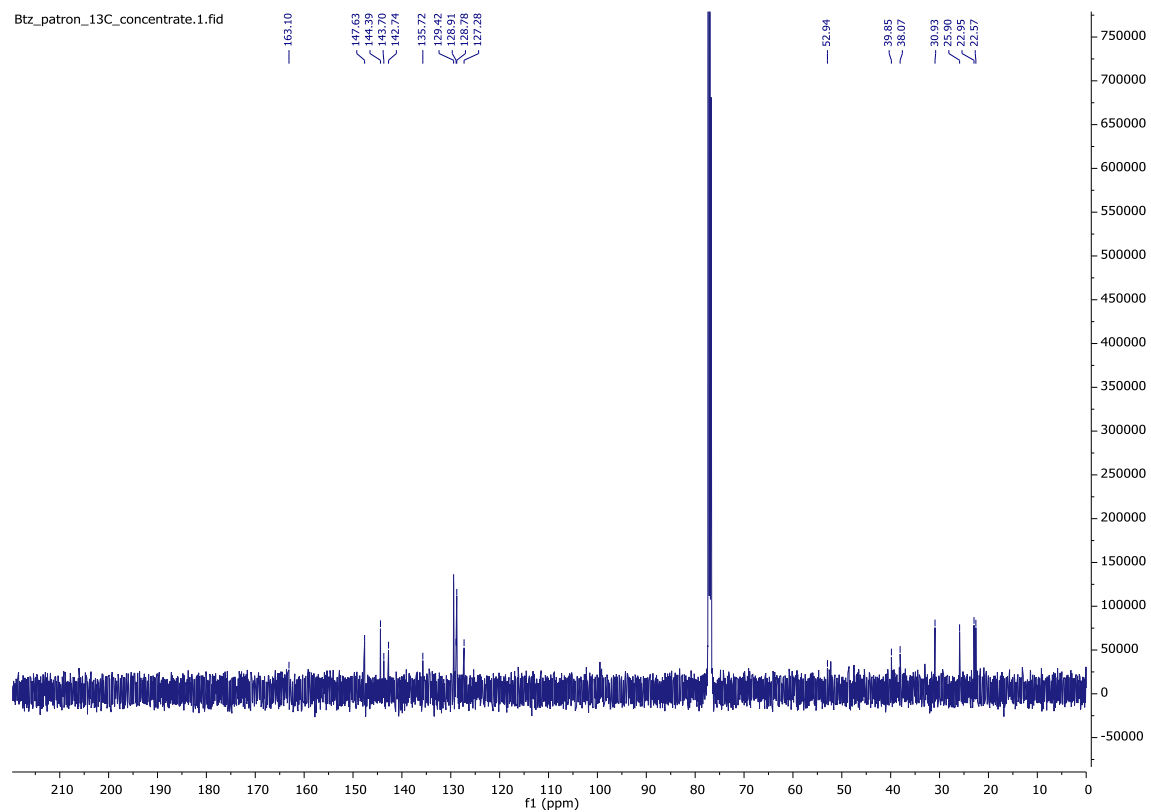

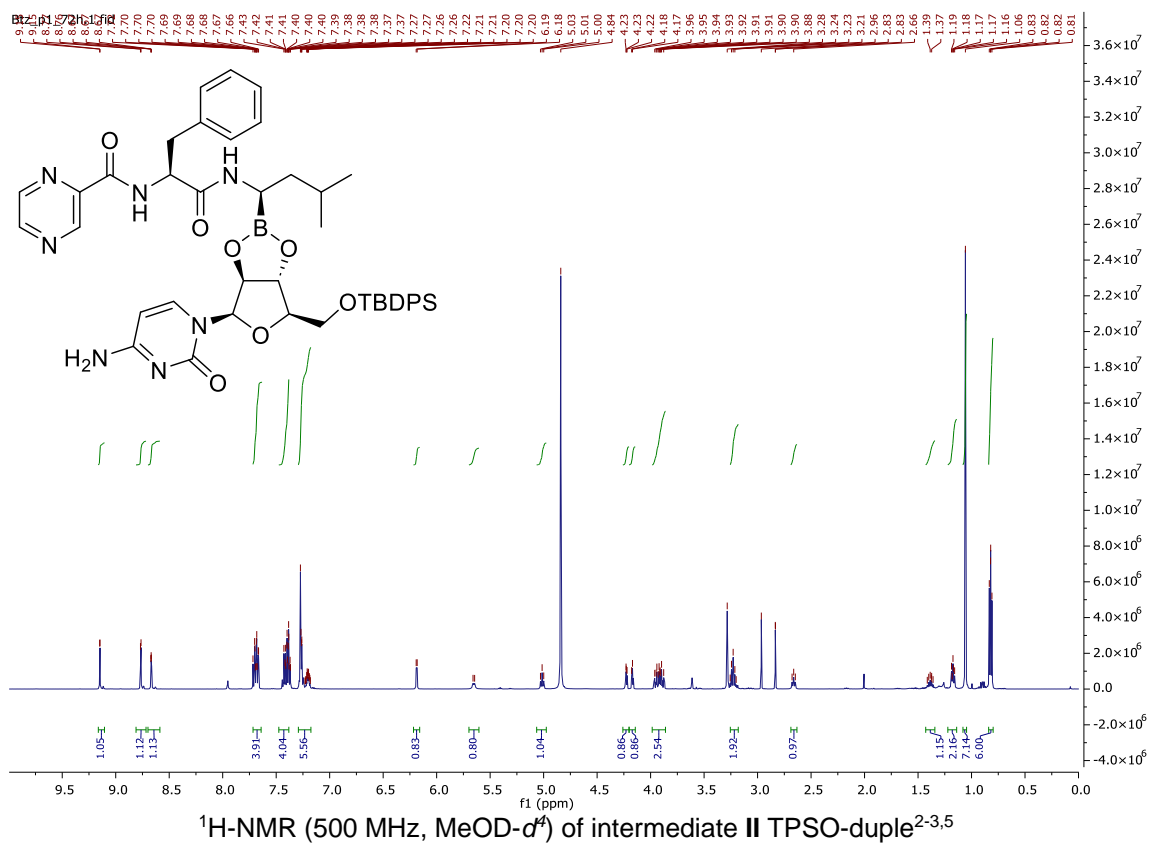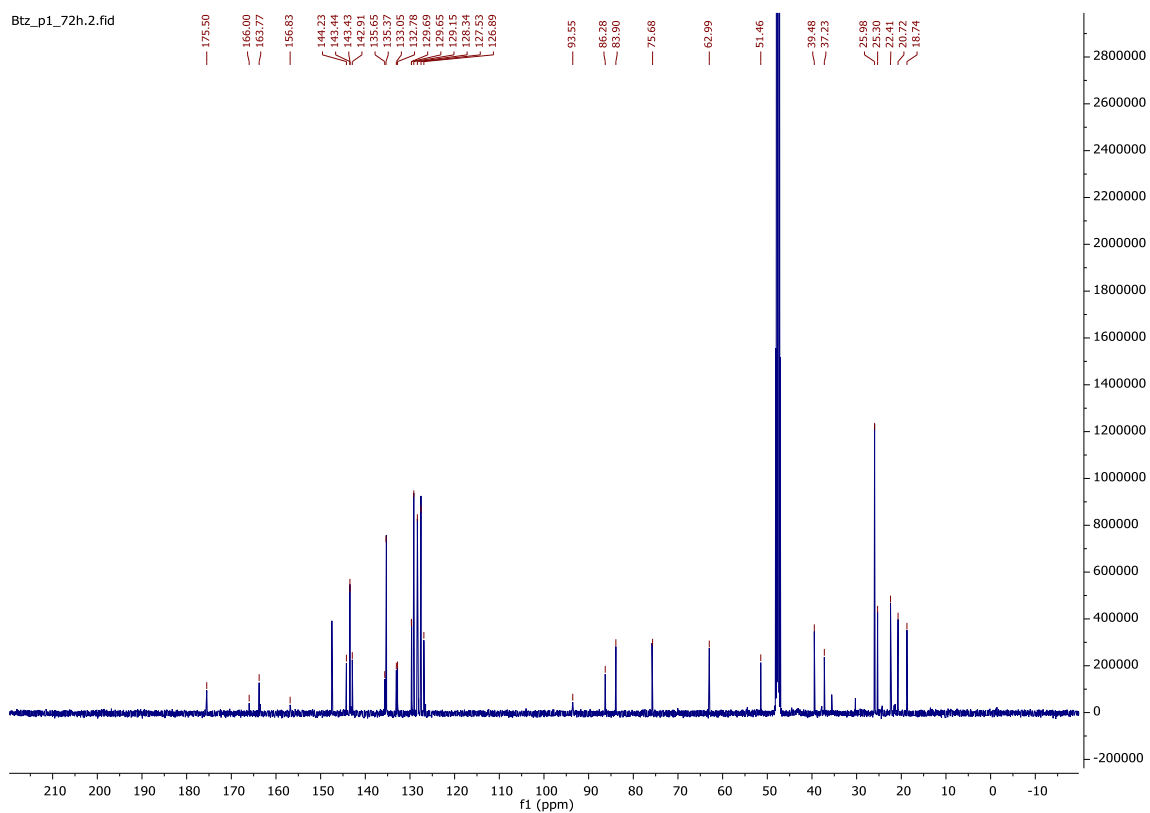

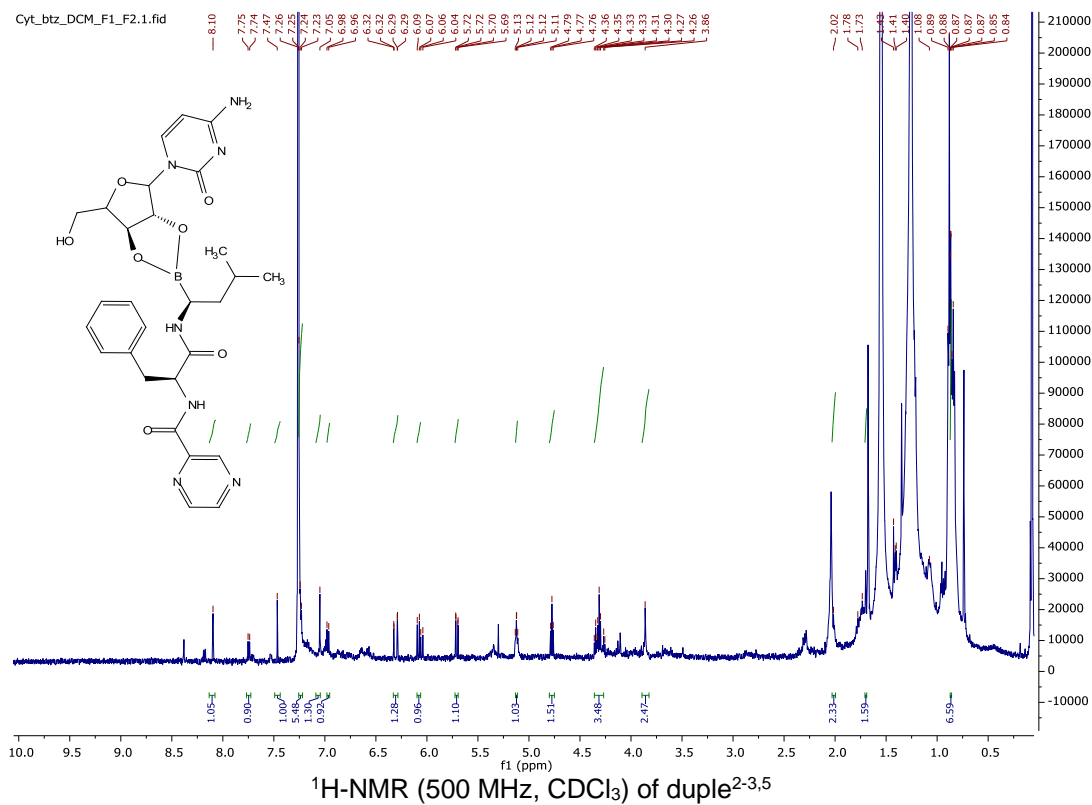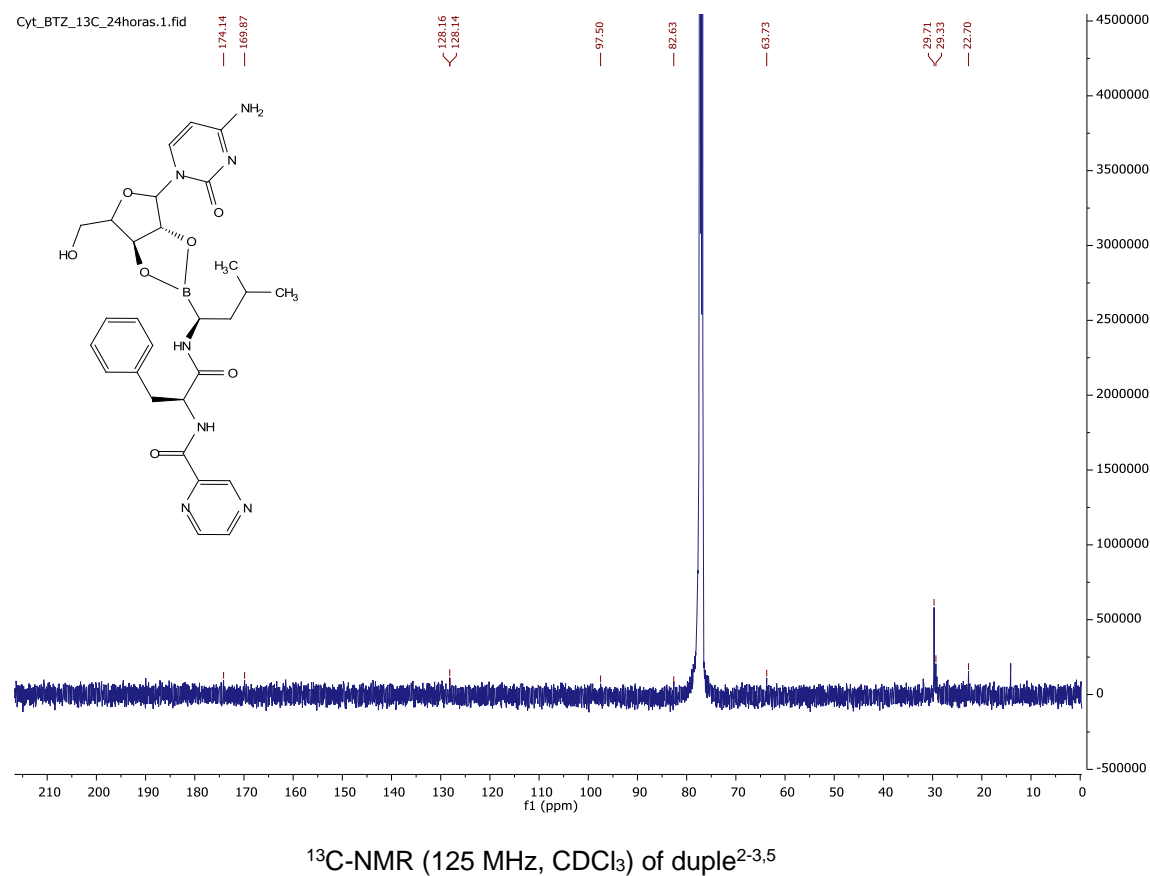

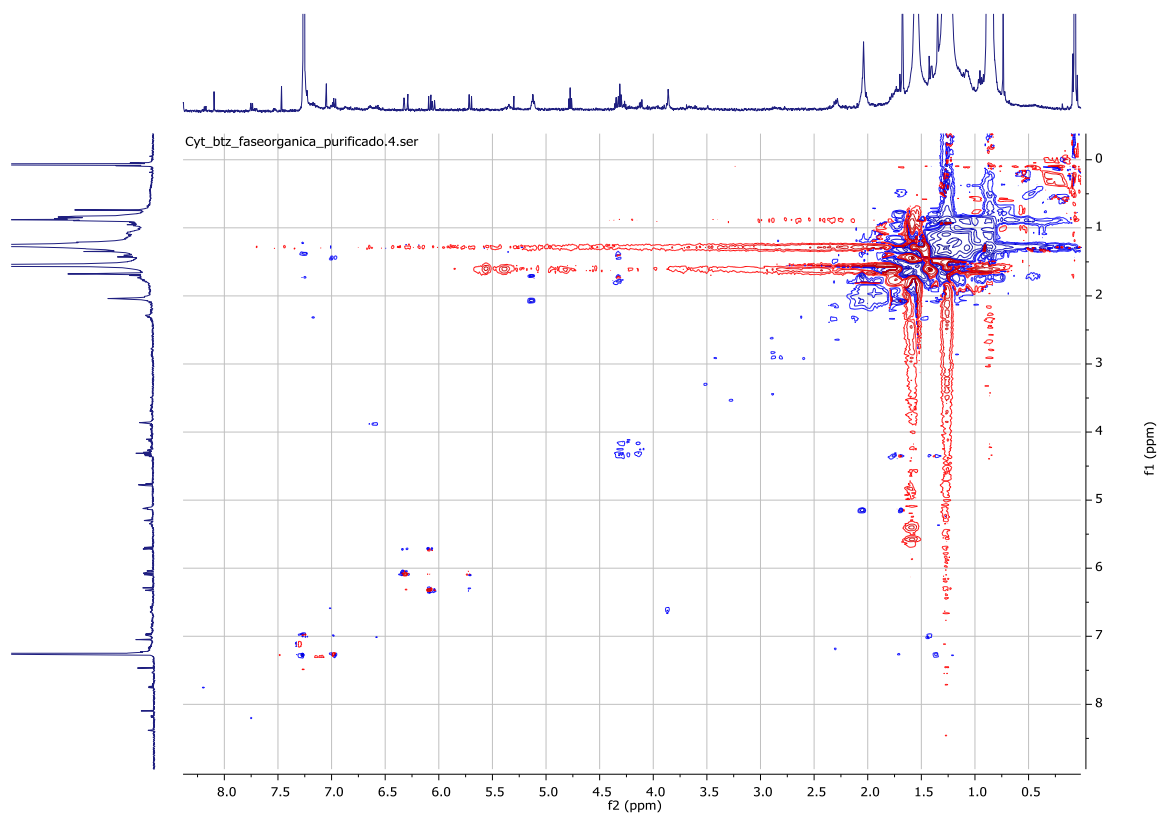

Bidimensional NOESY-experiment of duple<sup>2-3,5</sup>

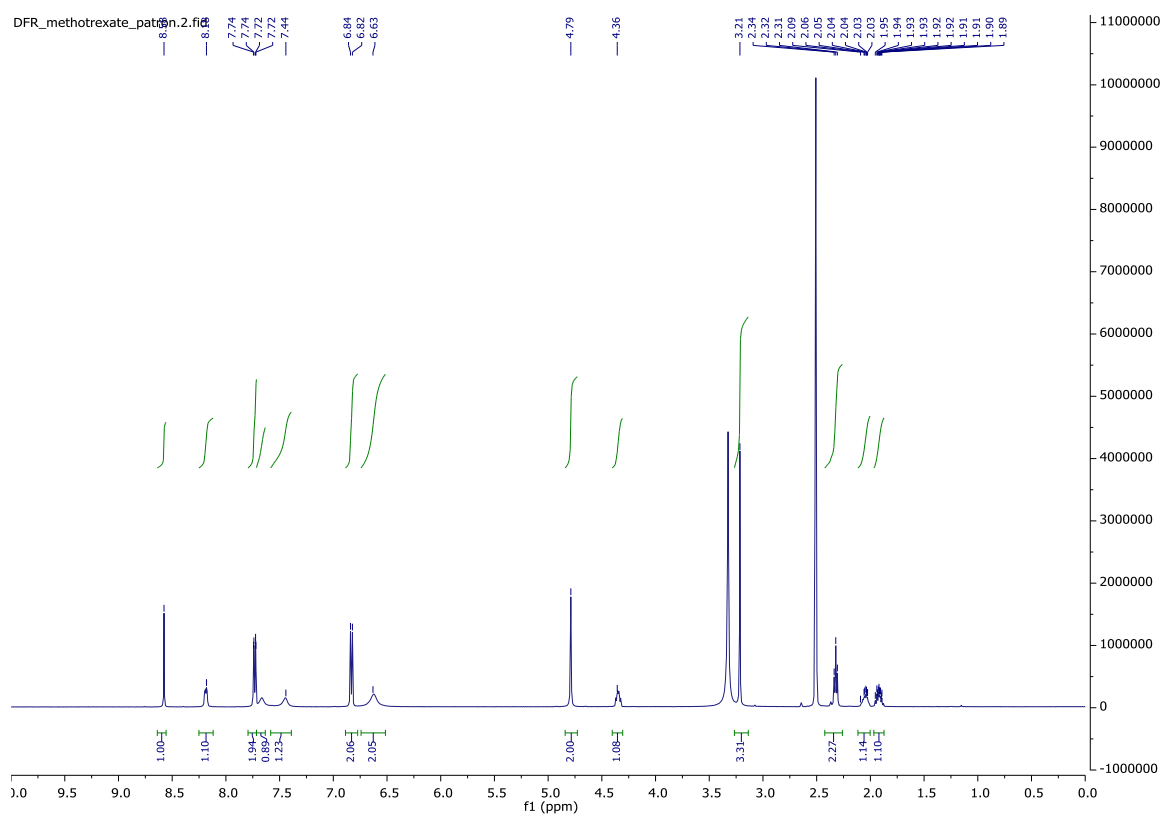

<sup>1</sup>H-NMR (500 MHz, DMSO-d<sub>6</sub>) of Methotrexate

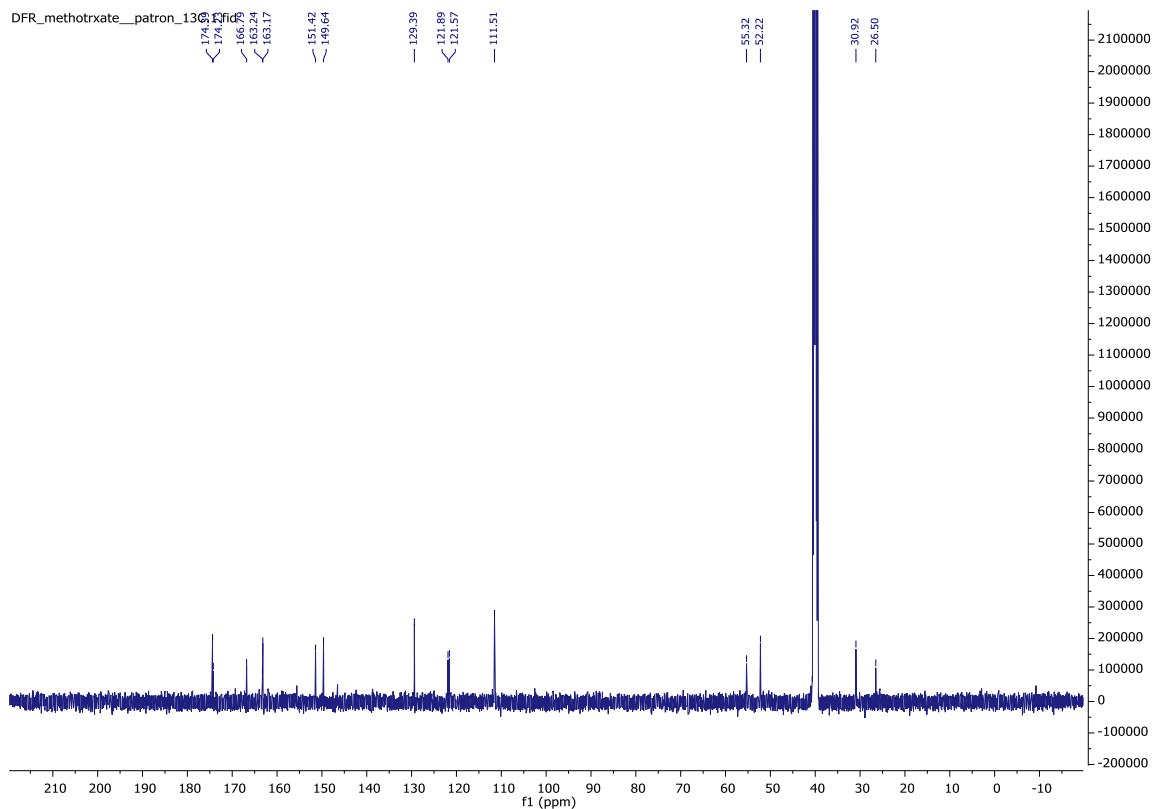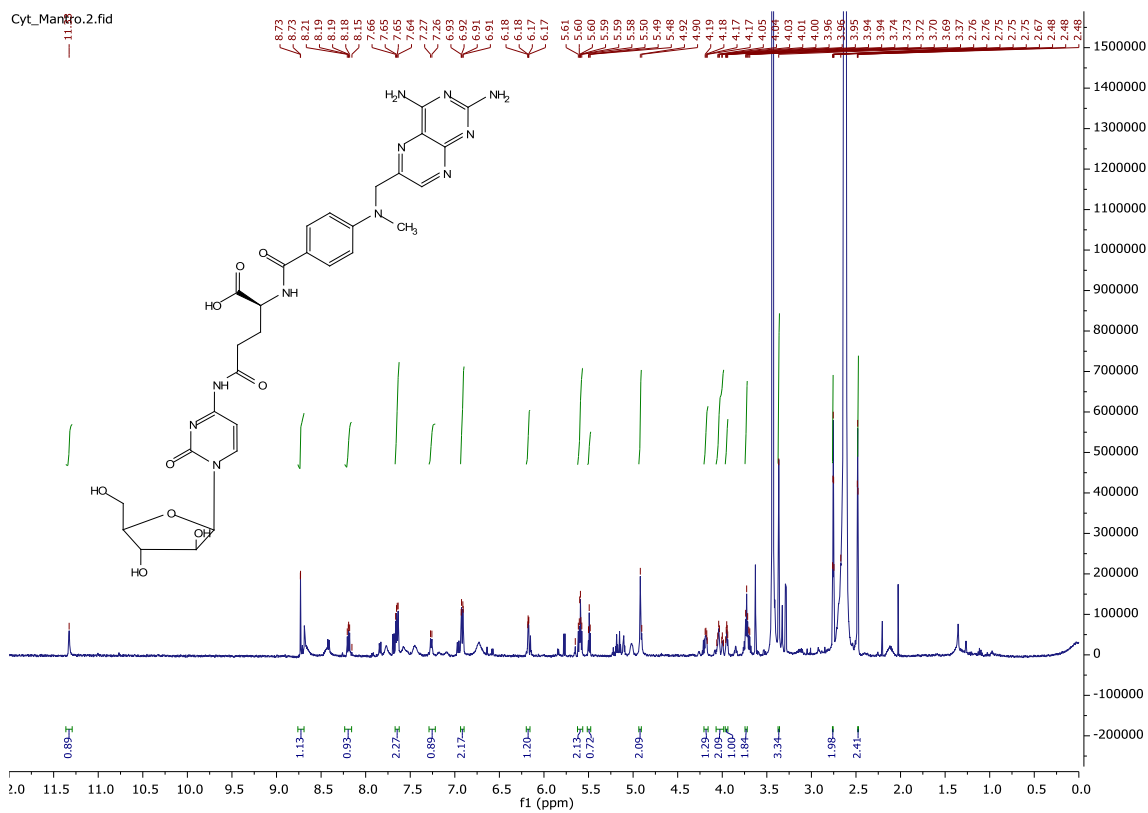

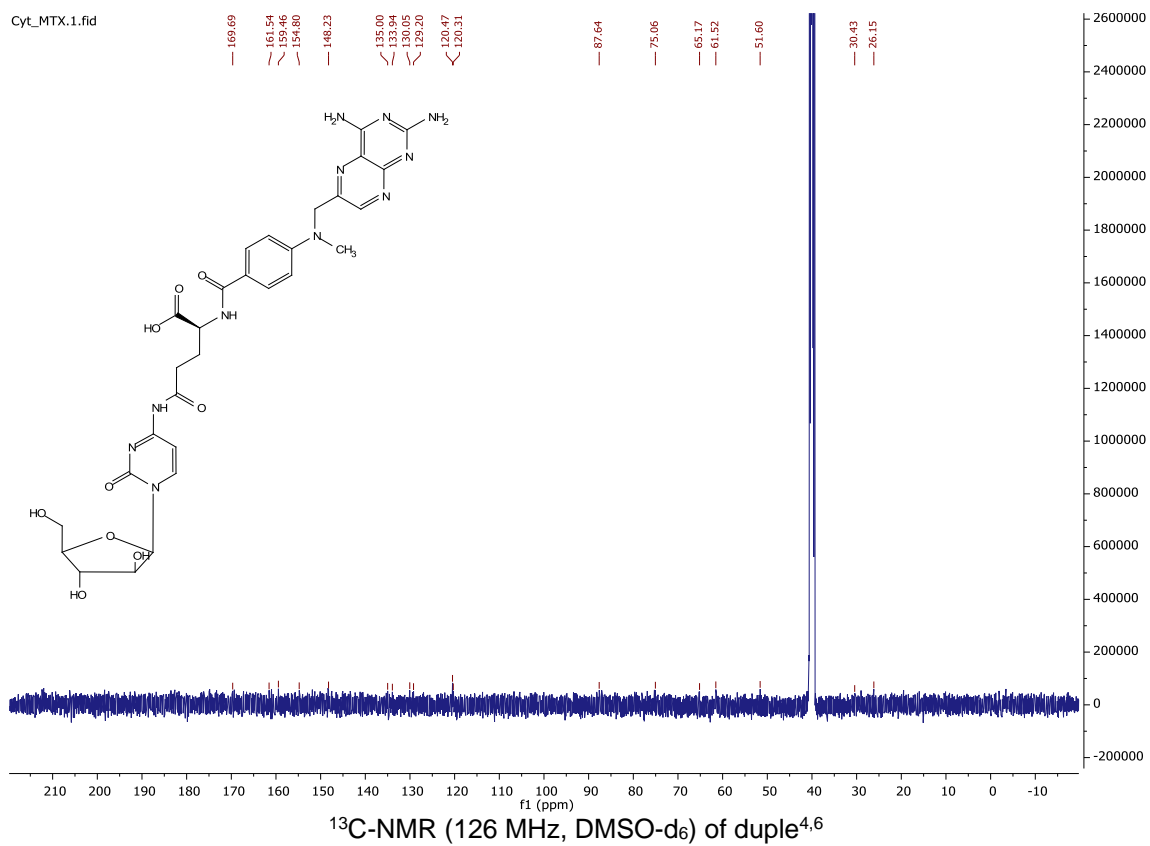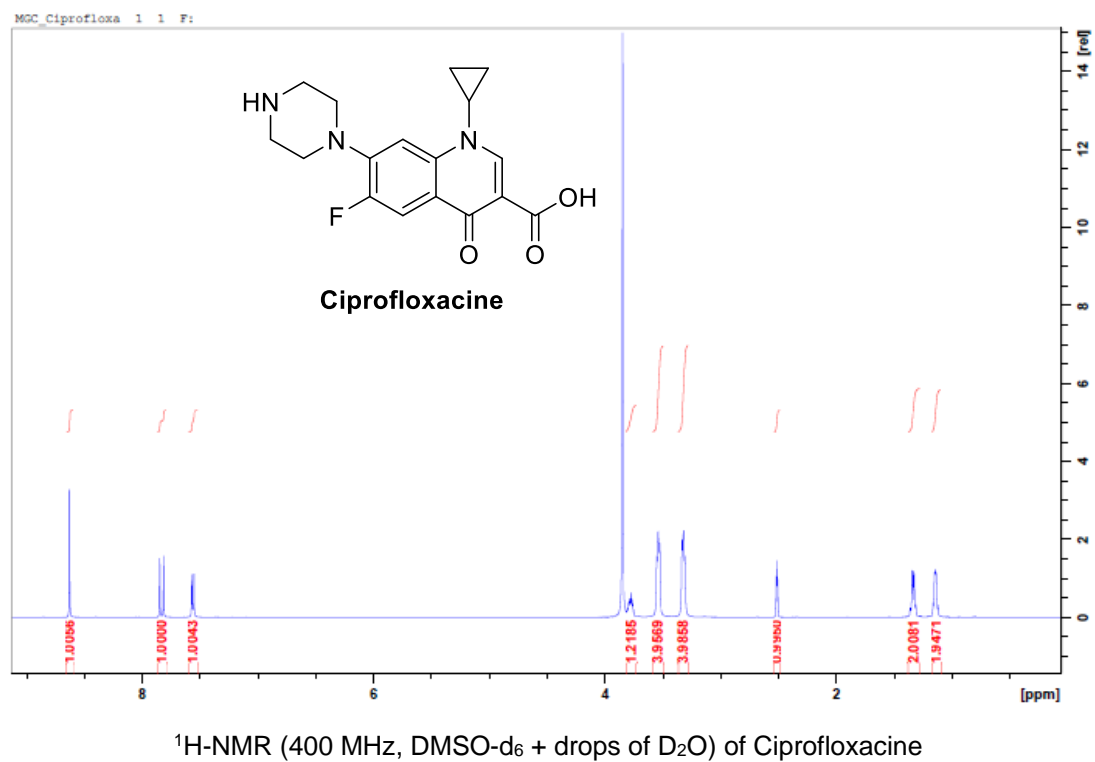

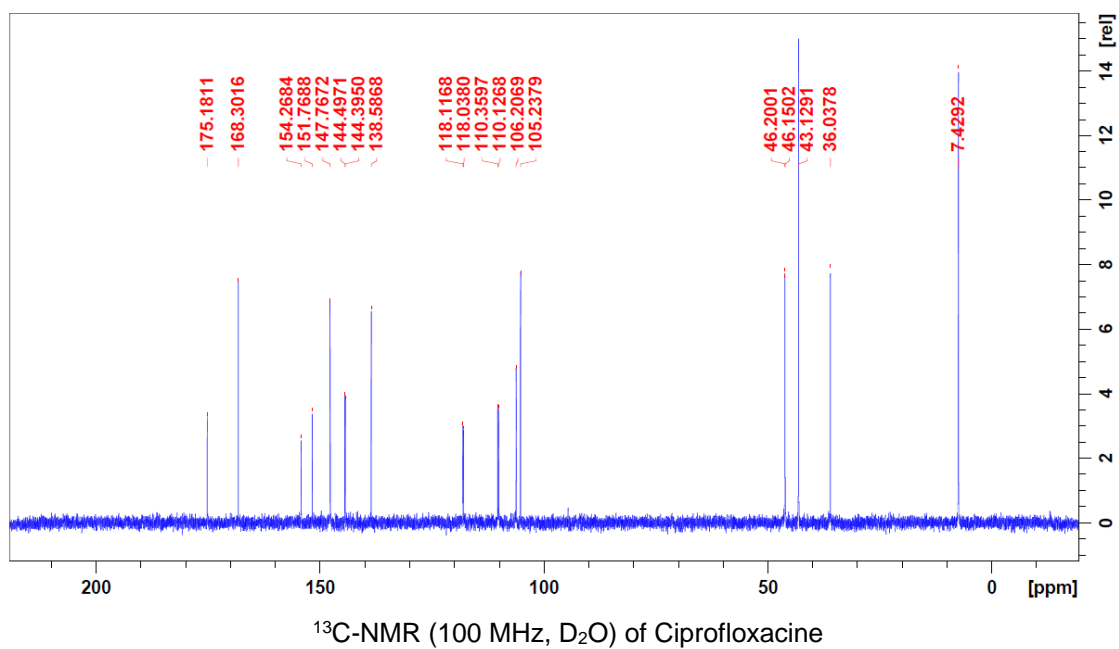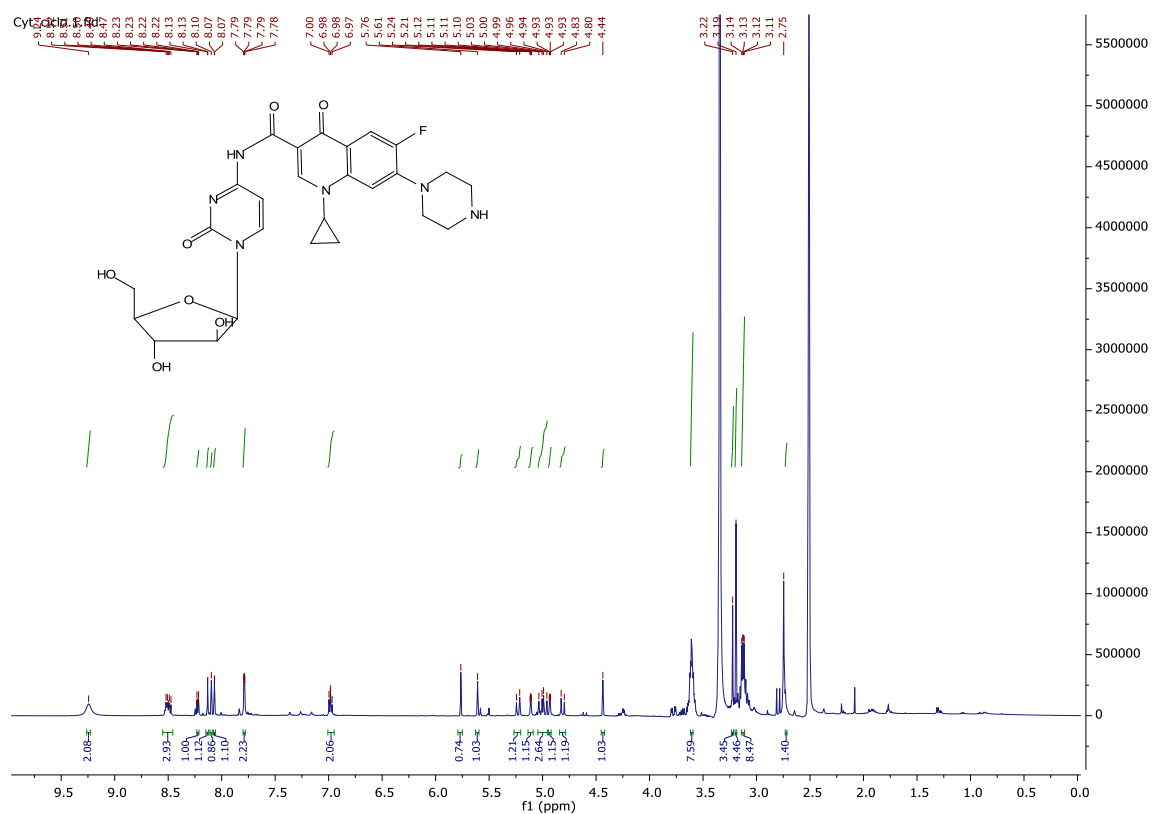

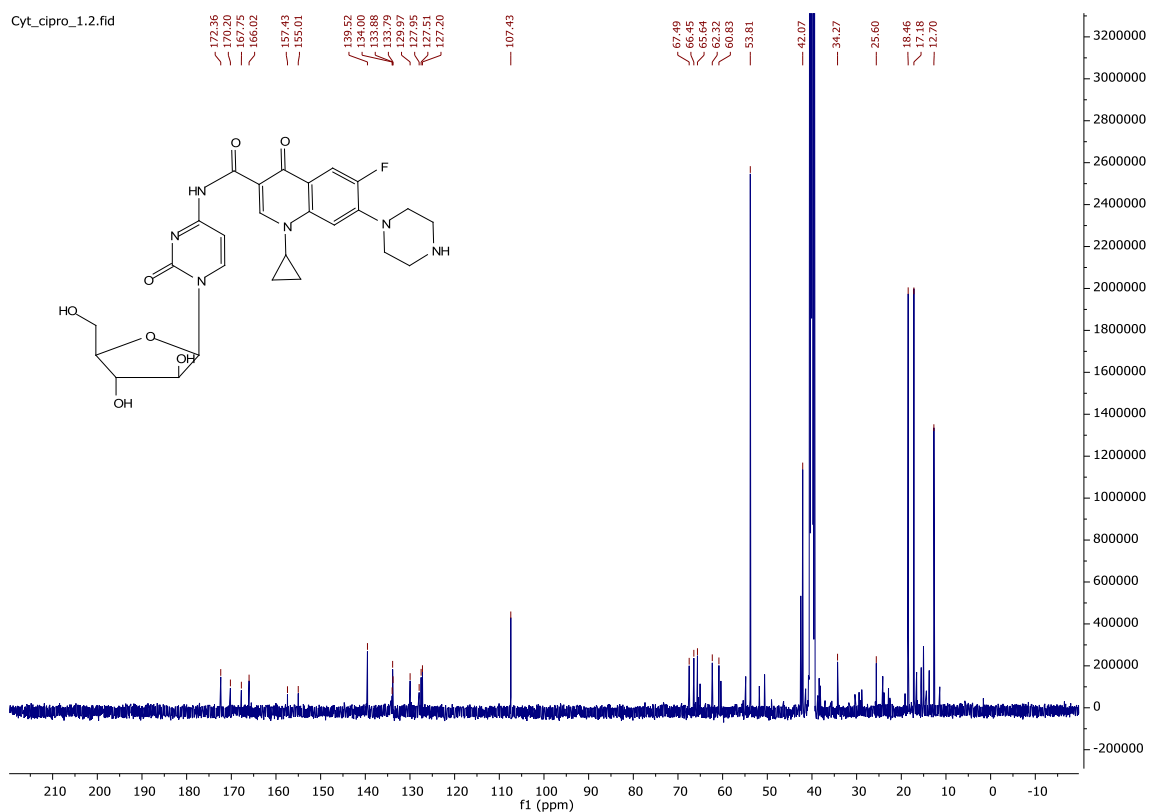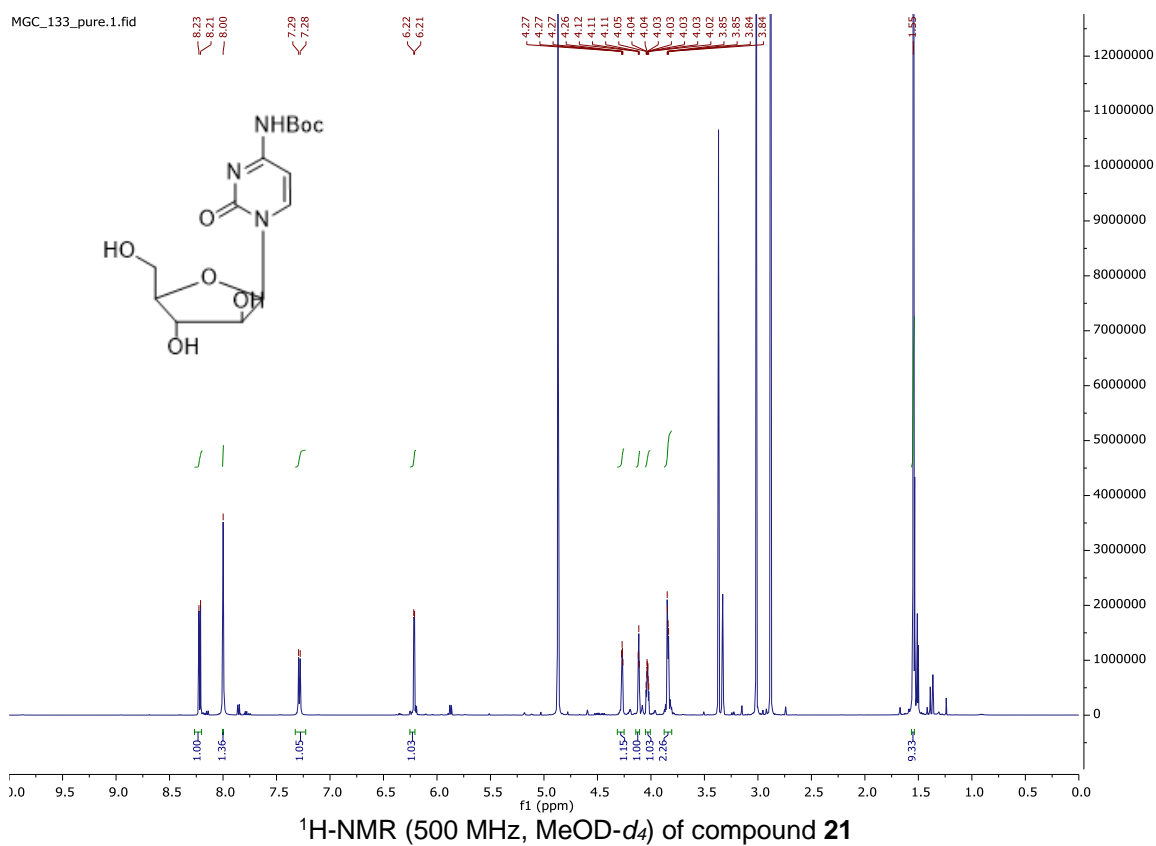

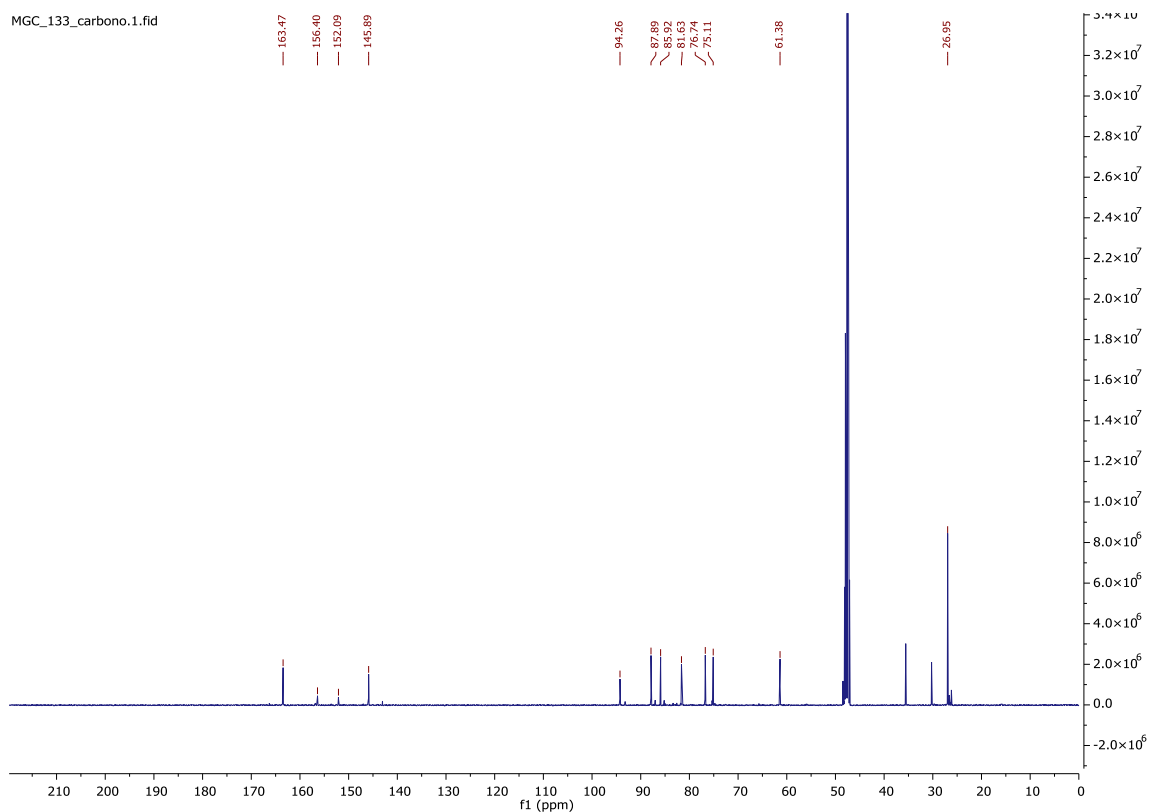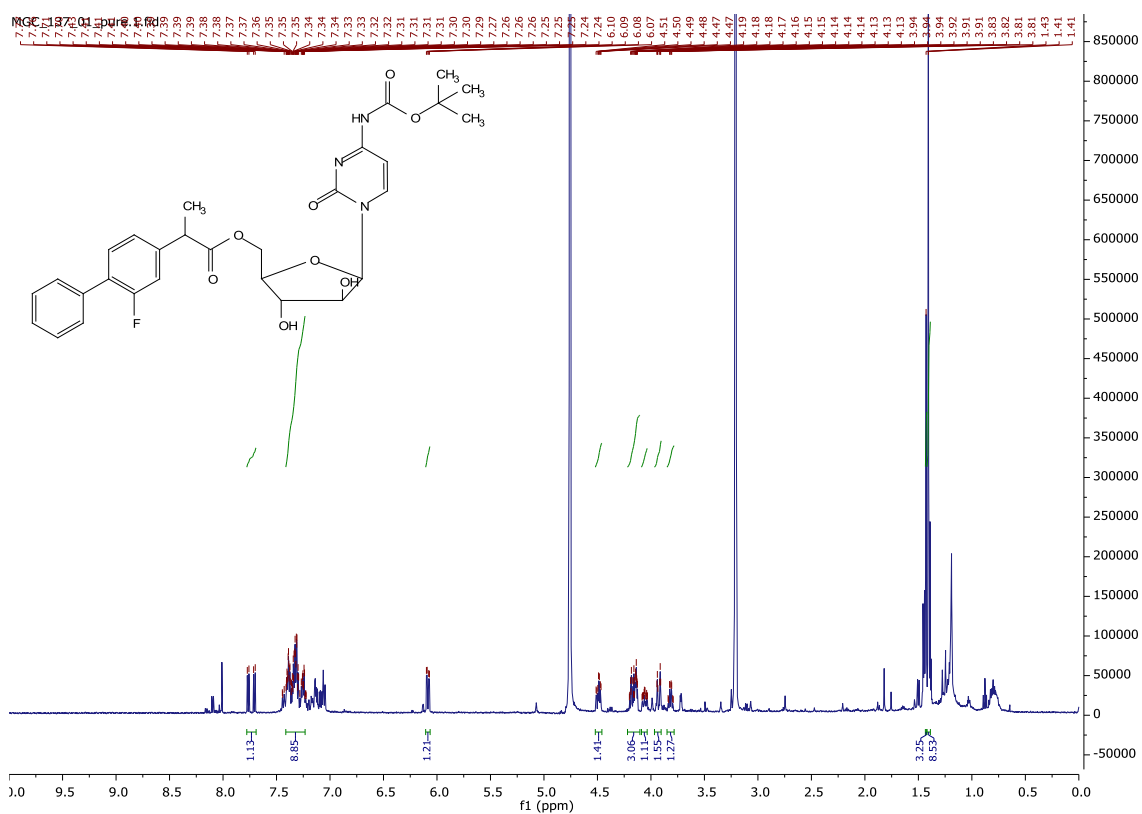

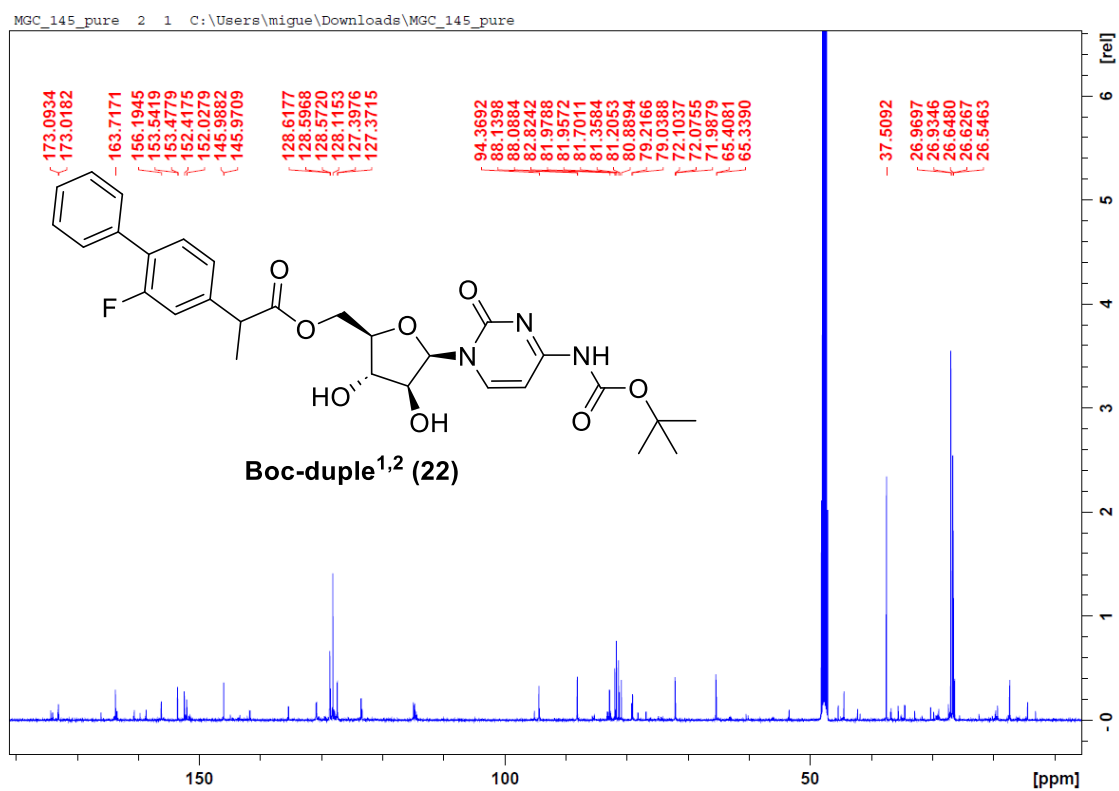

<sup>13</sup>C-NMR (125 MHz, MeOD-*d*<sub>4</sub>) of Boc-duple<sup>1,2</sup> (22)

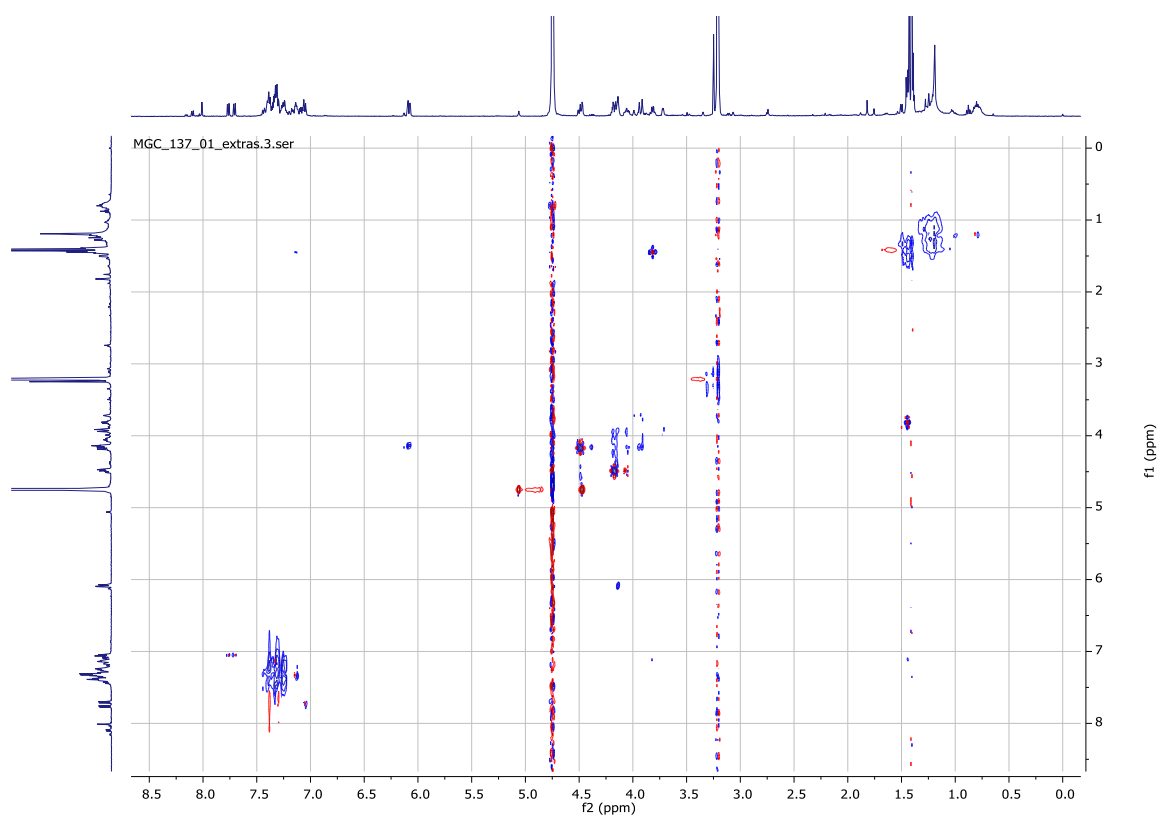

Bidimensional NOESY-experiment of Boc-duple<sup>1,2</sup> (22)

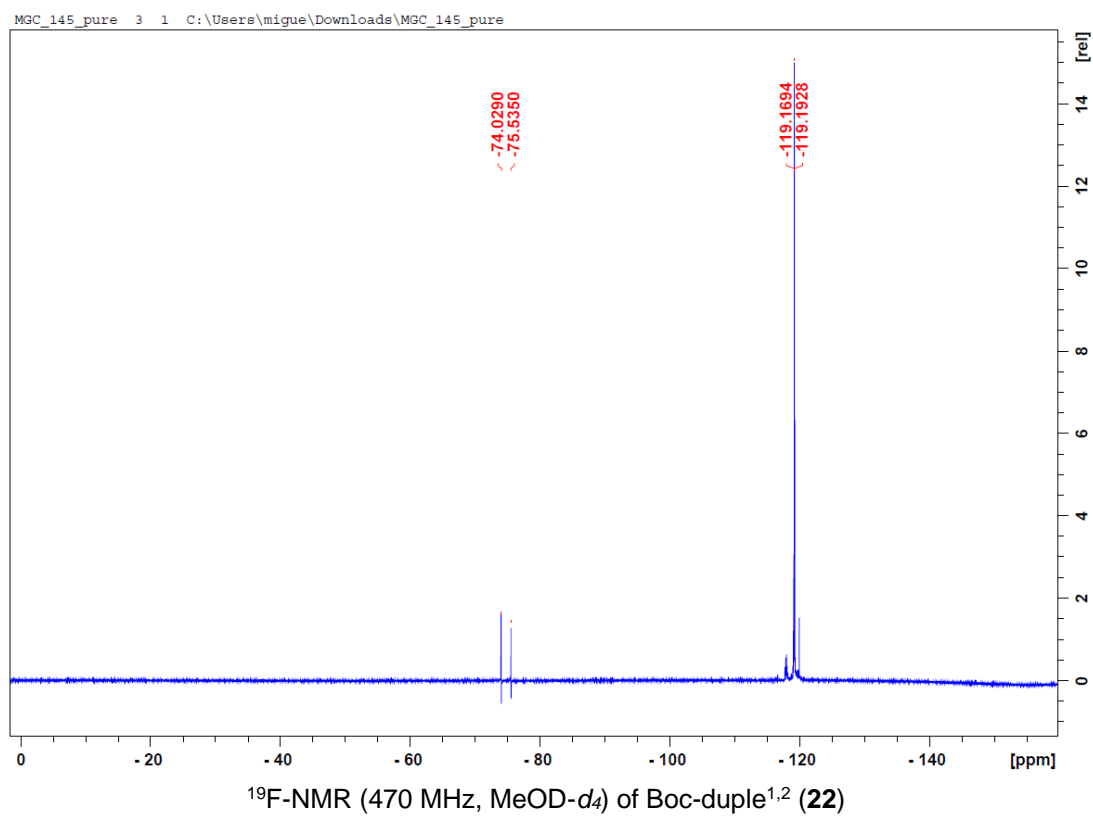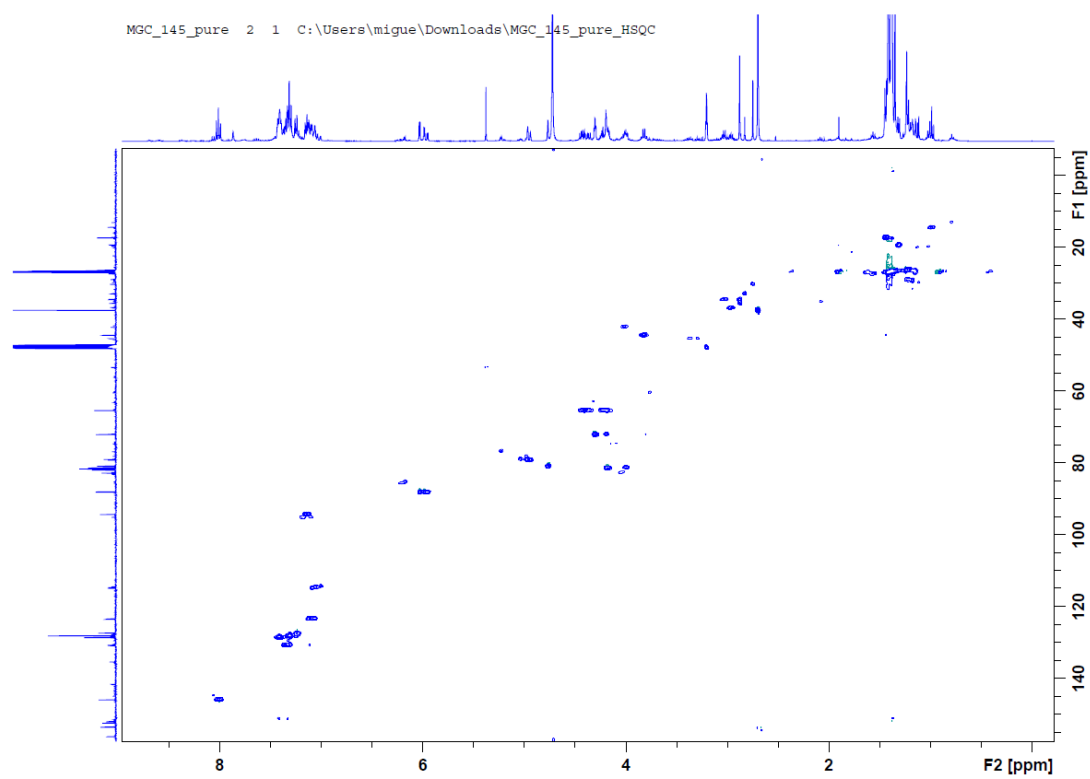

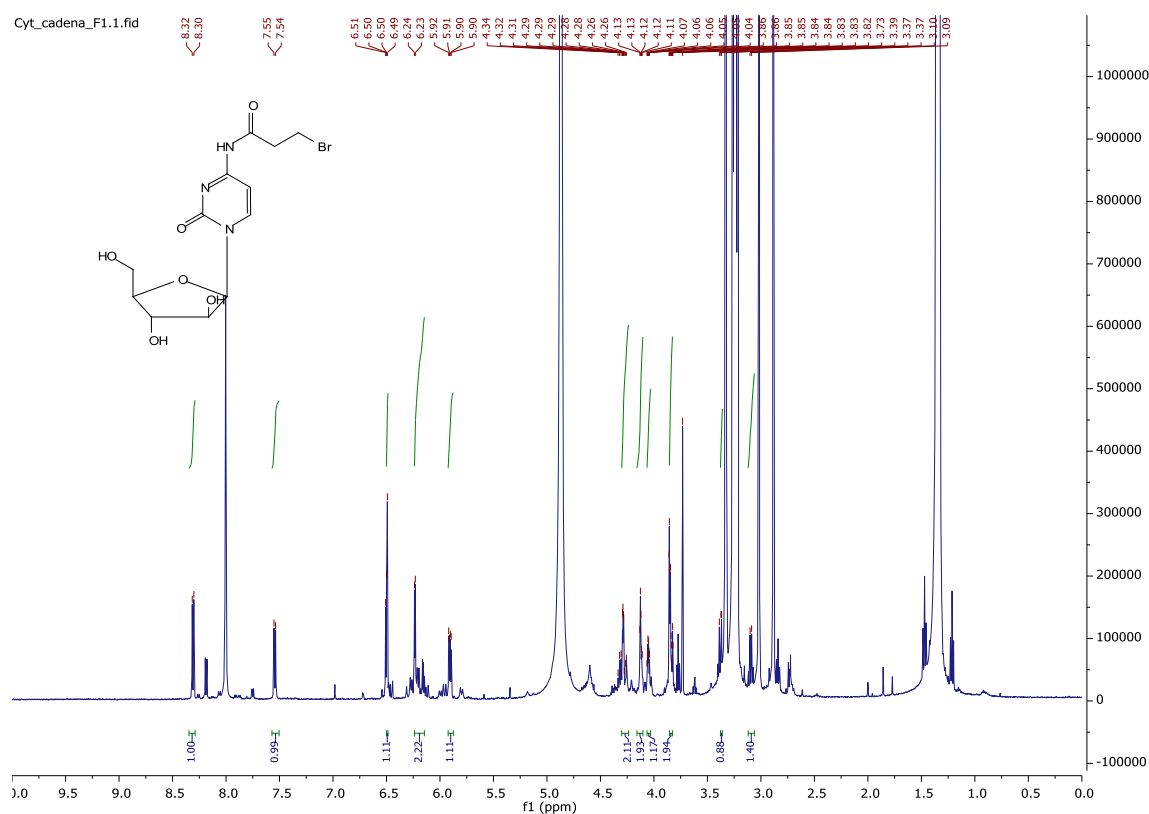

<sup>1</sup>H-NMR (500 MHz, MeOD-*d*<sub>4</sub>) of compound **20**

### Chemical nomenclature of our 16-duples

|                                                           |                          |
|-----------------------------------------------------------|--------------------------|
| [Compound <b>4</b> ]: Ibuprofen bond in position 4        | = duple <sup>4,1</sup>   |
| [Compound <b>5</b> ]: Flurbiprofen bond in position 4     | = duple <sup>4,2</sup>   |
| [Compound <b>6</b> ]: Folic acid bond in position 4       | = duple <sup>4,3</sup>   |
| [Compound <b>7</b> ]: Sulfasalazine bond in position 4    | = duple <sup>4,4</sup>   |
| [Compound <b>8</b> ]: Bortezomib bond in position 2 and 3 | = duple <sup>2-3,5</sup> |
| [Compound <b>9</b> ]: Methotrexate bond in position 4     | = duple <sup>4,6</sup>   |
| [Compound <b>10</b> ]: Tazobactam bond in position 4      | = duple <sup>4,7</sup>   |
| [Compound <b>11</b> ]: Ciprofloxacin bond in position 4   | = duple <sup>4,8</sup>   |
| [Compound <b>12</b> ]: Dapsone bond in position 4         | = duple <sup>4,9</sup>   |
| [Compound <b>13</b> ]: Metoclopramide bond in position 4  | = duple <sup>4,10</sup>  |

[Compound **14**]: Hydroxychloroquine bond in position 4 = duple<sup>4,11</sup>

[Compound **15**]: Norfloxacin bond in position 4 = duple<sup>4,12</sup>

[Compound **16**]: Furosemide bond in position 4 = duple<sup>4,13</sup>

[Compound **17**]: Cilastatin bond in position 4 = duple<sup>4,14</sup>

[Compound **18**]: Alprostadil bond in position 4 = duple<sup>4,15</sup>

[Compound **19**]: Dexamethasone bond in position 4 = duple<sup>4,16</sup>

[Compound **23**]: Flurbiprofen bond in position 1 = duple<sup>1,2</sup>

### Characterization of all synthesized compounds

#### Duple<sup>4,1</sup> (compound 4):

C<sub>22</sub>H<sub>29</sub>N<sub>3</sub>O<sub>6</sub>

**<sup>1</sup>H-NMR (500 MHz, CDCl<sub>3</sub>) δ (ppm):** 8.00 (d, *J* = 7.5 Hz, 1H, H-6), 7.30 (d, *J* = 6.9 Hz, 1H, H-5), 7.17 (d, *J* = 7.7 Hz, 2H, H-6'), 7.06 (d, *J* = 7.9 Hz, 2H, H-7'), 5.96 (d, *J* = 3.6 Hz, 1H, H-7), 5.35 (m, 1H, -CON-H) 4.34 (s, 1H, H-8), 4.17 (s, 1H, C-9), 3.95 (s, 1H, H-10), 3.86 – 3.74 (m, 2H, H-11), 3.68 (m, 1H, H-2'), 2.39 (d, *J* = 7.1 Hz, 2H, H-11'), 1.79 (dt, *J* = 13.4, 6.7 Hz, 1H, ), 1.43 (d, *J* = 6.9 Hz, 3H, H-3'), 0.85 (d, *J* = 6.5 Hz, 6H, H-13');

**<sup>13</sup>C-NMR (126 MHz, CDCl<sub>3</sub>) δ (ppm):** 174.75 (-CONH-), 162.22 (C-2), 155.72 (C-6), 146.67 (C-7), 141.17 (C-4'), 136.88 (C-7'), 129.75 (C-5',6'), 127.38 (C-7',8'), 96.54 (C-7), 87.97, 85.22, 77.29, 76.44, 75.07, 61.59, 47.46 (C-2'), 44.98 (C-10'), 29.71 (C-11'), 22.41 (C-13'), 18.36 (C-3');

Exact mass: 431.2056; **MALDI-TOF-MS:** 454.428 [M + Na]<sup>+</sup>

#### Duple<sup>4,2</sup> (compound 5):

C<sub>24</sub>H<sub>24</sub>FN<sub>3</sub>O<sub>6</sub>

**<sup>1</sup>H-NMR (500 MHz, DMSO-*d*<sub>6</sub>) δ (ppm):** 11.10 (s, 1H, CON-H), 8.08 (d, *J* = 7.5 Hz, 1H, C-6), 7.57-7.45 (m, 5H, -Ph), 7.40 (m, 1H, C-5'), 7.34-7.29 (m, 2H, C-6', C-8'), 7.21 (m, 1H, C-5), 6.09-6.05 (m, 1H, C-7), 5.57-5.47 (m, -OH 2H), 5.42 (m, 1H, -OH), 5.07 (bs, 1H, -OH), 4.10-4.03 (m, 2H, C-2', C-8), 3.93 (m, 1H, C-9), 3.84 (dt, *J* = 5.7 Hz, 3.3 Hz 1H, C-10), 3.62 (dd, *J* = 5.5, 3.2 Hz, 2H, C-11), 1.45 (d, *J* = 6.5 Hz, 3H, C-3');

**<sup>13</sup>C-NMR (126 MHz, DMSO-*d*<sub>6</sub>) δ (ppm):** 174.61 (C-1'), 174.58, 162.72, 160.31-158.35 (*J* C-F = 246.2 Hz), 154.85, 147.46 (C-6), 135.29, 131.32, 131.29, 129.21, 129.19, 129.08, 128.31, 127.47-127.37 (*J* C-F = 10.7 Hz), 124.45, 124.43, 124.37, 124.34, 115.72, 115.68, 115.53, 115.49, 94.76 (C-5), 87.54 (C-7), 86.33, 86.27, 76.59, 76.54, 75.05 (C-8), 61.48 (C-11), 45.70 (C-2'), 18.35 (C-3'), 18.21;

Exact mass: 469.1649; **MALDI-TOF-MS**: 492.069 m/z [M + Na]<sup>+</sup>

**Duple<sup>4,3</sup> (compound 6):**

C<sub>28</sub>H<sub>30</sub>N<sub>10</sub>O<sub>10</sub>

**<sup>1</sup>H-NMR (500 MHz, CDCl<sub>3</sub>) δ (ppm):** 8.59 (bs, 1H, -COO-H), 7.82 (d, *J* = 8.4 Hz, 1H), 7.62 (d, *J* = 8.3 Hz, 1H), 7.34 – 7.30 (m, 1H), 7.27 – 7.22 (m, 1H), 6.80 – 6.75 (m, 1H), 6.37 (d, *J* = 17.3, 1H, H-6), 6.19 – 6.01 (m, 1H), 5.80 (d, *J* = 17.4 Hz, H-5), 5.53 (m, 1H), 4.37 – 4.30 (m, 2H), 3.62 – 3.54 (m, 3H), 3.46–3.39 (m, 2H), 3.26 – 3.20 (m, 1H), 2.97 – 2.91 (m, 1H), 2.73–2.65 (m, 2H), 2.32 – 1.95 (bs, 3H);

**<sup>13</sup>C-NMR (126 MHz, DMSO) δ (ppm):** 170.80, 169.47, 169.03, 161.45, 149.06, 147.66, 132.44, 120.85, 112.94, 112.34, 60.22, 55.97, 55.84, 55.37, 49.06, 46.34, 46.31, 41.95, 35.21, 31.14, 26.41, 26.35, 24.14, 23.07, 21.21, 14.54;

Exact mass: 666.2146; **MALDI-TOF-MS**: 651.381 [M-16 (-NH<sub>2</sub>)]<sup>+</sup>

**Duple<sup>4,4</sup> (compound 7):**

C<sub>27</sub>H<sub>25</sub>N<sub>7</sub>O<sub>9</sub>S

**<sup>1</sup>H NMR (500 MHz, DMSO-*d*<sub>6</sub>) δ (ppm):** 8.58 (d, *J* = 2.3 Hz, 1H), 8.32 (dd, *J* = 8.8, 2.4 Hz, 1H), 8.14 – 7.99 (m, 6H), 7.93 (d, *J* = 8.8 Hz, 1H), 7.81 – 7.69 (m, 2H), 7.11 (d, *J* = 6.1 Hz, 1H, H-7), 6.77 (d, *J* = 10.5 Hz, 1H, H-6), 5.73 (d, *J* = 10.6 Hz, 1H, H-5), 5.71 (d, *J* = 4.5 Hz, 1H, -OH), 5.03 (d, *J* = 5.9 Hz, 1H, -OH), 4.98 – 4.94 (m, 2H, OH), 4.27 (m, 1H), 4.04 (m, 1H), 3.85 – 3.78 (m, 1H), 3.19 (m, 2H);

**<sup>13</sup>C NMR (126 MHz, DMSO-*d*<sub>6</sub>) δ** 169.55, 159.79, 149.69, 149.47, 138.93, 128.02, 127.97, 127.86, 127.02, 127.00, 125.71, 121.46, 116.45, 97.53, 86.27, 82.79, 73.72, 68.13, 59.52;

Exact mass: 623.1434; **MALDI-TOF-MS**: 528.767 [M – 94]<sup>+</sup>

**Duple<sup>2-3,5</sup> (compound 8):**

C<sub>28</sub>H<sub>34</sub>BN<sub>7</sub>O<sub>7</sub>

**<sup>1</sup>H-NMR (500 MHz, CDCl<sub>3</sub>) δ (ppm):** 8.10 (s, 1H), 7.74 (d, *J* = 7.9 Hz, 1H), 7.47 (s, 1H), 7.27 – 7.23 (m, 5H, -Ph), 7.05 (s, 1H), 6.97 (d, *J* = 8.7 Hz, 4H), 6.31 (dd, *J* = 17.0, 1.2 Hz, 1H, H-7), 6.08 (d, *J* = 10.4 Hz, 1H, H-6), 5.71 (dd, *J* = 10.4, 1H, H-5), 5.15 – 5.09 (m, 1H), 4.77 (t, *J* = 6.4 Hz, 1H), 4.38 – 4.22 (m, 3H), 3.86 (s, 2H), 2.02–2.00 (m, 2H), 1.78–1.76 (m, 1H), 0.95 – 0.81 (m, 6H, -(CH<sub>3</sub>)<sub>2</sub>);

**<sup>13</sup>C-NMR (126 MHz, MeOD-*d*<sub>4</sub>) δ (ppm):** 174.14 (-CONH-) 169.87 (-CONH-), 128.16, 128.14, 97.50 (C-7), 82.63, 63.73, 29.71, 29.33 (-CH<sub>3</sub>)<sub>2</sub>, 22.70;

Exact mass: 591.2613; **MALDI-TOF-MS:** 656.346 [M + Zn-H]<sup>+</sup> [Reference 1]

**Duple<sup>4,6</sup> (compound 9):**

C<sub>29</sub>H<sub>33</sub>N<sub>11</sub>O<sub>9</sub>

**<sup>1</sup>H-NMR (500 MHz, DMSO-*d*<sub>6</sub>) δ (ppm):** 11.33 (s, 1H, -COO-H), 8.73 (s, 1H), 8.19 (d, *J* = 7.5, 1H, H-6), 7.65 (d, *J* = 9.1, 1.5 Hz, 2H), 7.26 (d, *J* = 7.7 Hz, 1H, H-6), 6.92 (dd, *J* = 9.1, 1.8 Hz, 2H), 6.18 (dd, *J* = 3.9, 1.9 Hz, 1H, H-7), 5.59 (m, 2H, -OH), 5.49 (m, 1H, -OH), 4.91 (s, 2H, H-11'), 4.23 – 4.15 (m, 1H, H-4'), 4.06 – 3.94 (m, 2H, H-8, H-9), 3.95 (dt, *J* = 5.6, 3.0 Hz, 1H, H-10), 3.73- (t, *J* = 5.6 Hz, 2H, H-11), 3.37 (s, 3H, -N-CH<sub>3</sub>), 2.75 (m, 2H), 2.48 (m, 2H);

**<sup>13</sup>C-NMR (126 MHz, DMSO-*d*<sub>6</sub>) δ (ppm):** 169.69, 161.54, 159.46, 154.80, 148.23, 135.00, 133.94, 130.05, 129.20, 120.47, 120.31, 87.64, 75.06, 65.17, 61.52, 51.60, 30.43, 26.15;

Exact mass: 679.2463; **MALDI-TOF-MS:** 702.417 m/z [M + Na]<sup>+</sup>, 684.433 m/z [M - 17 (-NH<sub>3</sub>) + Na]<sup>+</sup>

**Duple<sup>4,8</sup> (compound 11):** [Reference 59 in the maintext]

C<sub>26</sub>H<sub>29</sub>FN<sub>6</sub>O<sub>7</sub>

**<sup>1</sup>H-NMR (500 MHz, DMSO-*d*<sub>6</sub>) δ (ppm):** 9.24 (s, 2H), 8.59 – 8.45 (m, 3H), 8.28 – 8.20 (m, 1H), 8.13 (s, 1H), 8.10 (s, 1H), 8.07 (s, 1H), 7.79 (m, 1H), 6.98 (m, 1H), 5.76 (s, 1H), 5.61 (s, 1H), 5.23 (m, 1H), 5.11 (m, 1H), 5.00 (m, 2H), 4.93 (m, 1H), 4.81 (m, 1H), 4.44 (s, 1H), 3.61 (m, 8H), 3.22 (m, 4H), 3.19 (m, 4H), 3.13 (m, 8H), 2.75 (s, 2H);

**<sup>13</sup>C-NMR (126 MHz, DMSO-*d*<sub>6</sub>) δ (ppm):** 172.36, 170.20, 167.75, 166.02, 157.43-155.01 (C-F, *J* C-F = 302 Hz), 139.52, 134.00, 133.88, 133.79, 129.97, 127.95, 127.51-127.20 (C-F, *J* C-F = 38.8 Hz), 107.43, 67.49, 66.45, 65.64, 62.32, 60.83, 53.81, 42.07, 34.27, 25.60, 18.46, 17.18, 12.70;

Exact mass: 556.2082; **MALDI-TOF-MS:** 557.534 m/z [M + H]<sup>+</sup>

**Compound 20:**

**<sup>1</sup>H-NMR (500 MHz, MeOD-*d*<sub>4</sub>) δ (ppm):** 8.31 (d, *J* = 7.5 Hz, 1H), 7.54 (d, *J* = 7.5 Hz, 1H), 6.56 – 6.43 (m, 1H), 6.23 (d, *J* = 3.8 Hz, 2H), 5.91 (m, 1H), 4.33 – 4.23 (m, 2H), 4.12 (m, 1H), 4.05 (m, 1H), 3.87 – 3.81 (m, 2H), 3.39 – 3.36 (m, 1H), 3.09 (m, 1H);

**Boc-Duple<sup>1,2</sup> (compound 22):**

C<sub>29</sub>H<sub>32</sub>FN<sub>3</sub>O<sub>8</sub>

**<sup>1</sup>H-NMR (500 MHz, MeOD-*d*<sub>4</sub>) δ (ppm):** 7.74 (d, *J* = 7.6 Hz, 1H), 7.49 – 7.22 (m, 10H), 6.08 (dd, *J* = 10.4, 3.5 Hz, 1H), 4.49 (ddd, *J* = 11.5, 7.9, 3.3 Hz, 1H), 4.21 – 4.12 (m, 3H), 4.10 – 4.03 (m, 1H), 3.93 (dt, *J* = 13.3, 2.2 Hz, 1H), 3.82 (qd, *J* = 7.2, 2.5 Hz, 1H), 1.43 (s, 3H), 1.41 (s, 9H);

**<sup>13</sup>C-NMR (126 MHz, MeOD-*d*<sub>4</sub>) δ (ppm):** 173.09, 173.02, 163.72, 156.19-153.54 (*J* C-F = 333.9 Hz), 153.48, 152.42, 152.03, 145.99, 128.62-128.57 (*J* C-F = 5.04 Hz), 128.12, 127.40, 94.37, 88.09, 82.82, 81.96, 81.70, 81.36, 80.89, 72.08, 65.41, 37.51, 26.97, 26.65, 26.55, 17.34, 14.38;

**<sup>19</sup>F-NMR (470 MHz, MeOD-*d*<sub>4</sub>) δ (ppm):** -119.17

Exact mass: 569.2173; **MALDI-TOF-MS:** 590.946 m/z [M + Na]<sup>+</sup>

**TPSO-Cyt (Intermediate I):**

**<sup>1</sup>H-NMR (500 MHz, MeOD-*d*<sub>4</sub>) δ (ppm):** 7.83 – 7.63 (m, 5H), 7.54 – 7.34 (m, 6H), 6.19 (d, *J* = 4.7 Hz, 1H), 5.64 (d, *J* = 7.5 Hz, 1H), 4.22 (dd, *J* = 4.6, 3.6 Hz, 1H), 4.17 (t, *J* = 3.9 Hz, 1H), 3.96 (dd, *J* = 9.9, 3.4 Hz, 1H), 3.93 – 3.86 (m, 2H), 1.06 (s, 9H);

**<sup>13</sup>C-NMR (126 MHz, MeOD-*d*<sub>4</sub>) δ (ppm):** 166.15, 157.00, 142.85, 135.37, 135.27, 133.06, 132.79, 129.68, 129.63, 127.53, 127.52, 93.49, 86.25, 83.86, 75.81, 75.70, 62.98, 25.96, 18.73;

**TPSO-Duple<sup>2-3,5</sup> (Intermediate II):**

C<sub>44</sub>H<sub>52</sub>BN<sub>7</sub>O<sub>7</sub>Si

**<sup>1</sup>H-NMR (500 MHz, MeOD-*d*<sub>4</sub>) δ (ppm):** 9.15 (d, *J* = 1.5 Hz, 1H), 8.77 (d, *J* = 2.5 Hz, 1H), 8.70 – 8.61 (m, 1H), 7.75 – 7.61 (m, 5H), 7.47 – 7.34 (m, 6H), 7.28 – 7.18 (m, 6H), 6.19 (d, *J* = 4.6 Hz, 1H), 5.65 (d, *J* = 7.5 Hz, 1H), 5.01 (t, *J* = 7.6 Hz, 1H), 4.26 – 4.21 (m, 1H), 4.17 (d, *J* = 4.0 Hz, 1H), 4.00 – 3.83 (m, 3H), 3.23 (t, *J* = 7.9 Hz, 2H), 2.66 (t, *J* = 7.6 Hz, 1H), 1.39 (dt, *J* = 13.4, 6.7 Hz, 1H), 1.17 (dd, *J* = 8.3, 6.4 Hz, 2H), 1.06 (s, 9H), 0.82 (dd, *J* = 6.6, 5.8 Hz, 8H);

**<sup>13</sup>C-NMR (126 MHz, MeOD-*d*<sub>4</sub>) δ (ppm):** 175.50, 166.00, 163.77, 156.83, 144.23, 143.44, 143.43, 142.91, 135.65, 135.37, 133.05, 132.78, 129.69, 129.65, 129.15, 128.34, 127.53, 126.89, 93.55, 86.28, 83.90, 75.68, 62.99, 51.46, 39.48, 37.23, 25.98, 25.30, 22.41, 20.72, 18.74;

Exact mass: 829.3791 **MALDI-TOF-MS:** 831.087 [M+H]<sup>+</sup>

## MALDI-TOF Analyses of synthesized duplexes

### MALDI-TOF-MS. 454.428 [M + Na]<sup>+</sup>

Comment 1

Comment 2

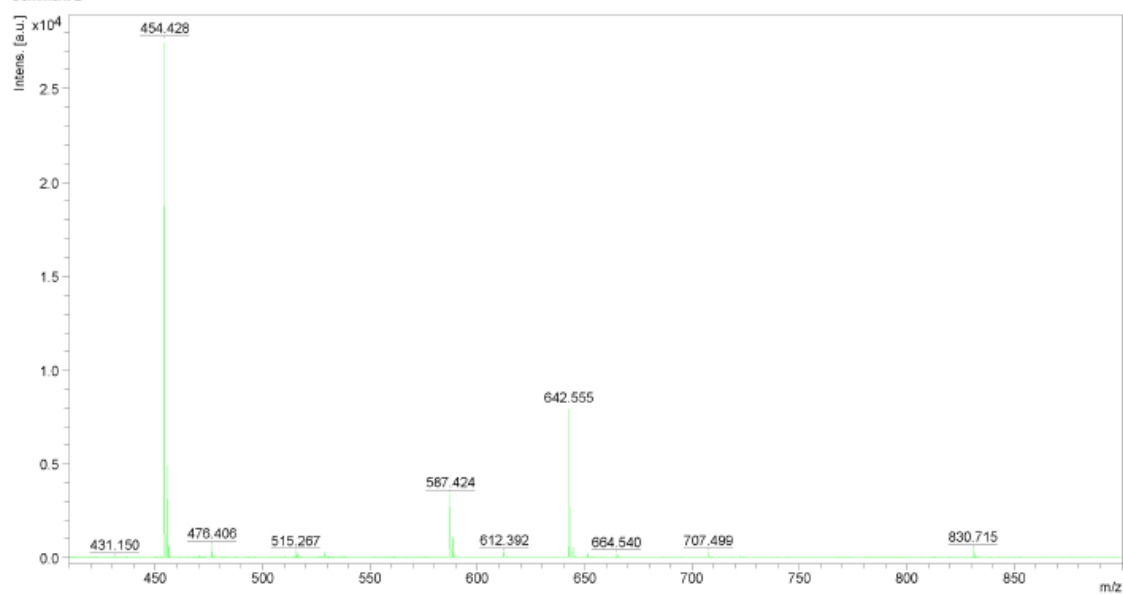

Mass spectrometry of duplex<sup>4,1</sup>

### MALDI-TOF-MS: 492.069 m/z [M + Na]<sup>+</sup>

Comment 1

Comment 2

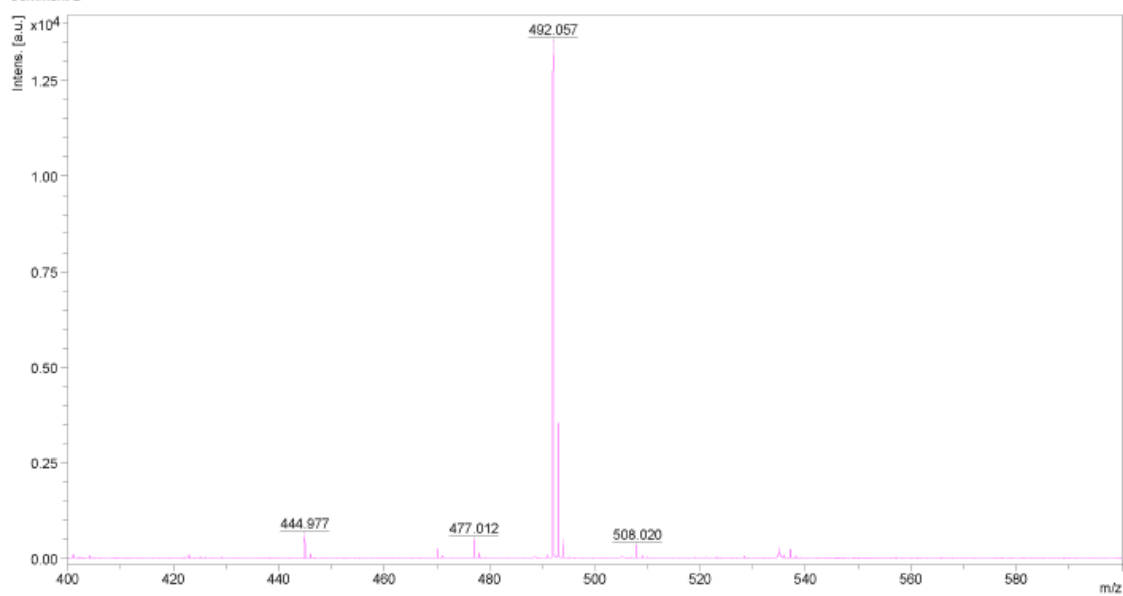

Mass spectrometry of duplex<sup>4,2</sup>

**MALDI-TOF-MS: 651.381 [M-16 (-NH<sub>2</sub>)]<sup>+</sup>**

Comment 1  
Comment 2

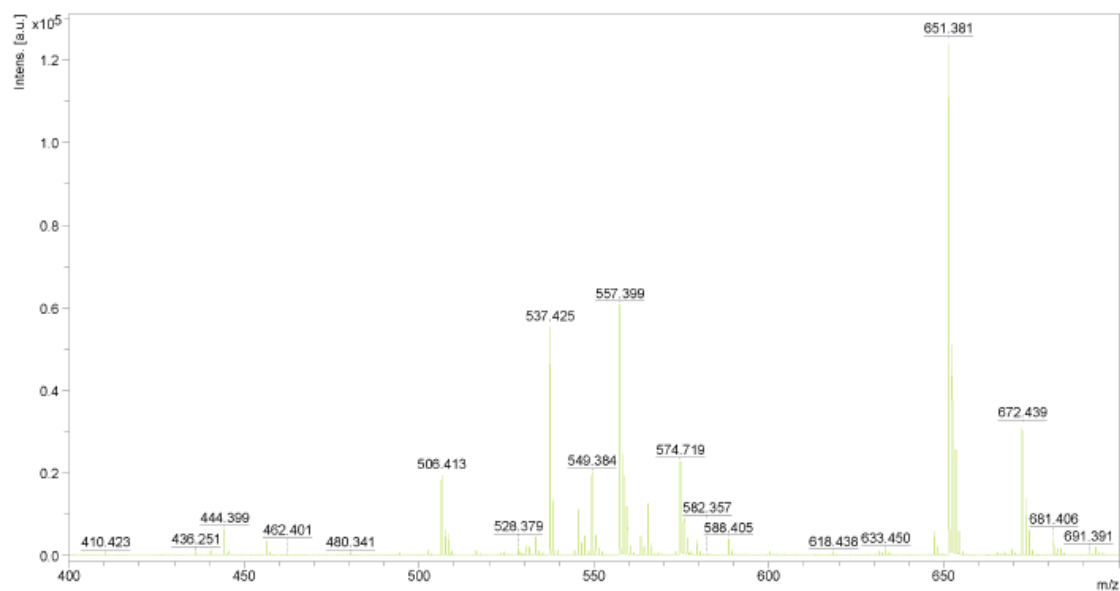

**MALDI-TOF-MS: 528.767 [M – 94]<sup>+</sup>**

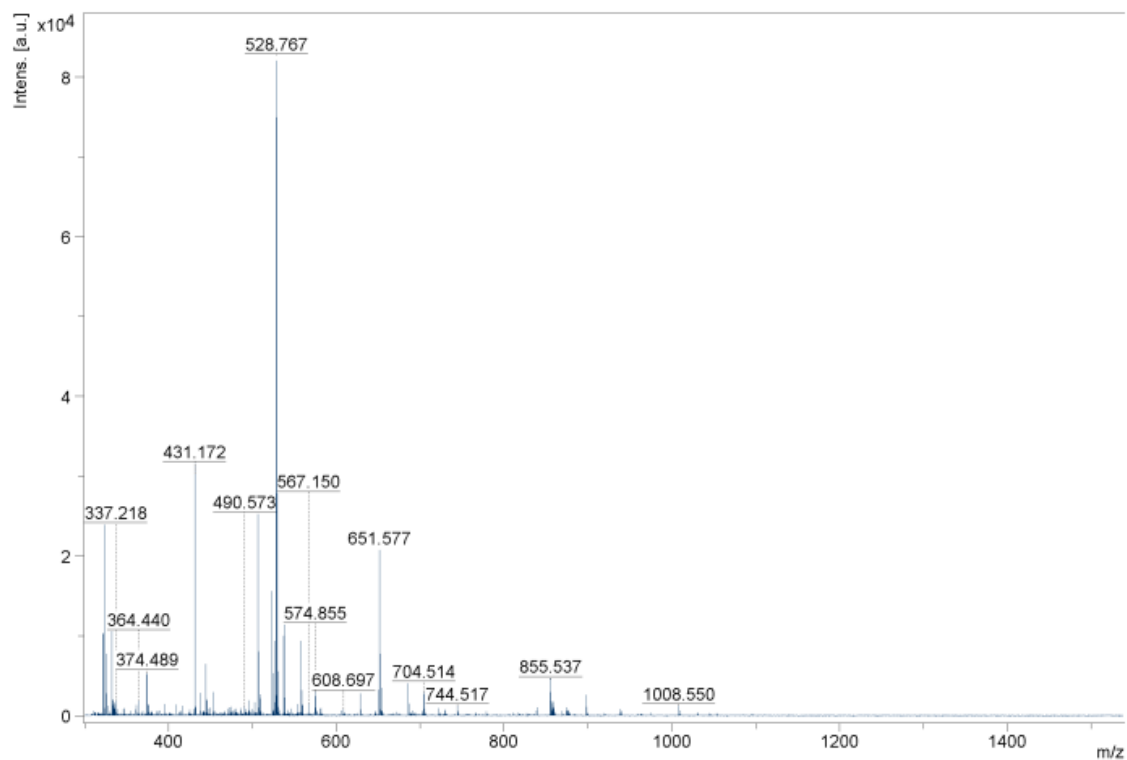

**MALDI-TOF-MS: 656.346 [M + Zn-H]<sup>+</sup> [Reference 58 in the maintext]**

Comment 1

Comment 2

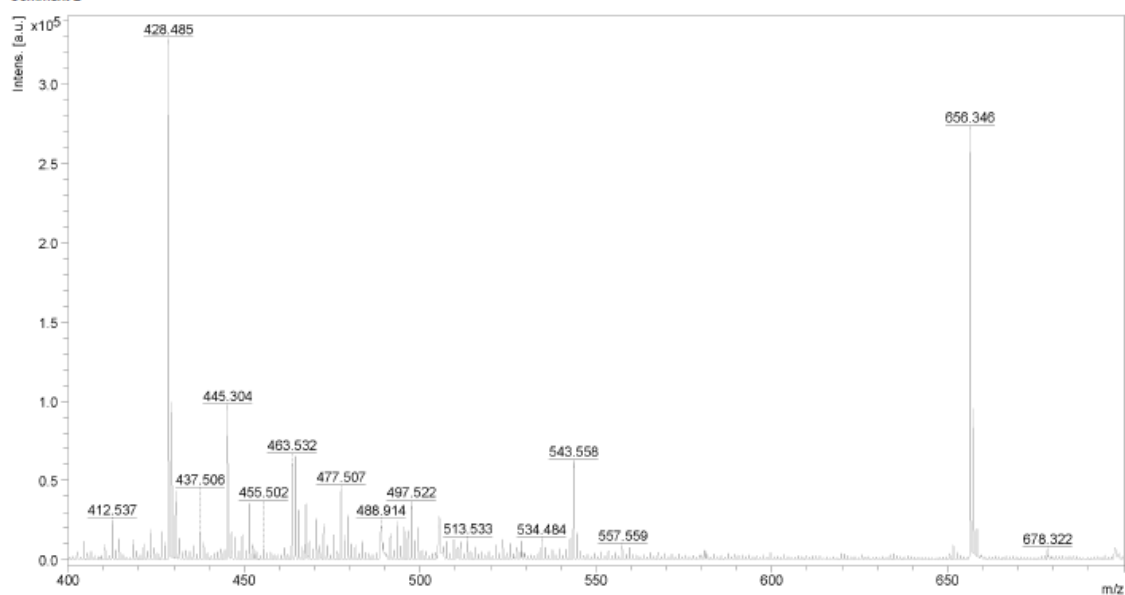

Mass spectrometry of duple<sup>2,3,5</sup>

**MALDI-TOF-MS: 702.417 m/z [M + Na]<sup>+</sup>, 684.433 m/z [M - 17 (-NH<sub>3</sub>) + Na]<sup>+</sup>**

Comment 1

Comment 2

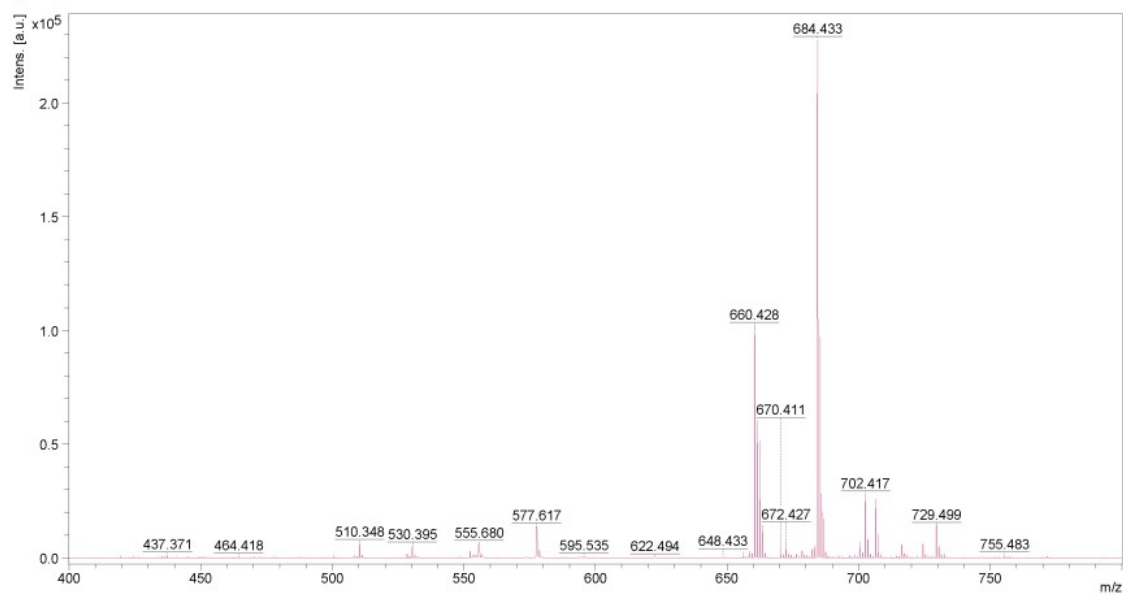

Mass spectrometry of duple<sup>4,6</sup>

**MALDI-TOF-MS: 557.534 m/z [M + H]<sup>+</sup>**

Comment 1

Comment 2

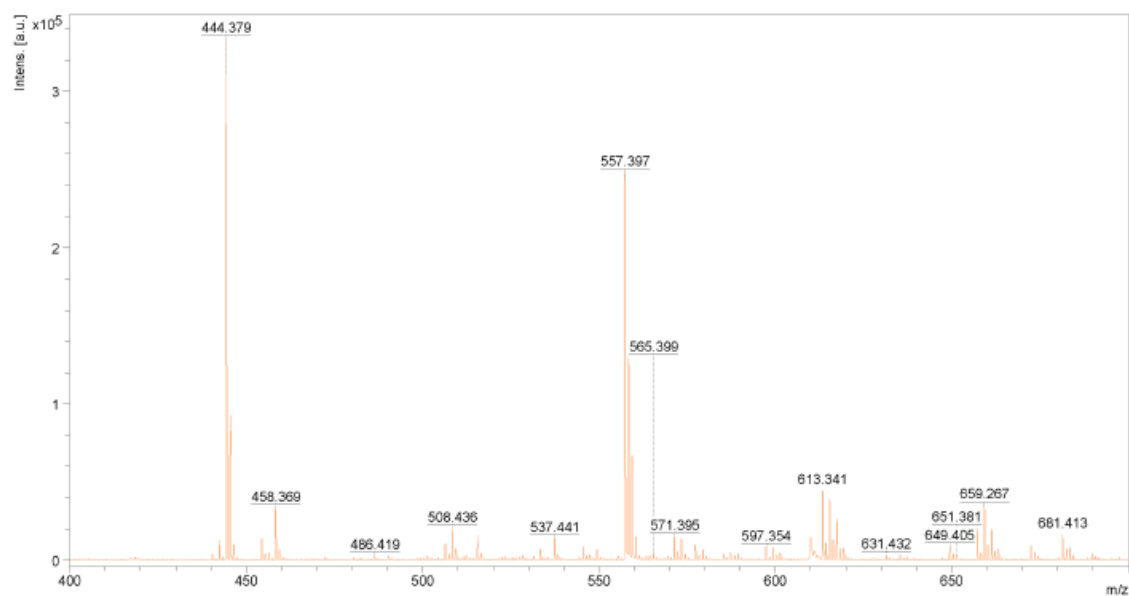

Mass spectrometry of duple<sup>4,8</sup>

**MALDI-TOF-MS: 831.087 [M+H]<sup>+</sup>**

Comment 1

Comment 2

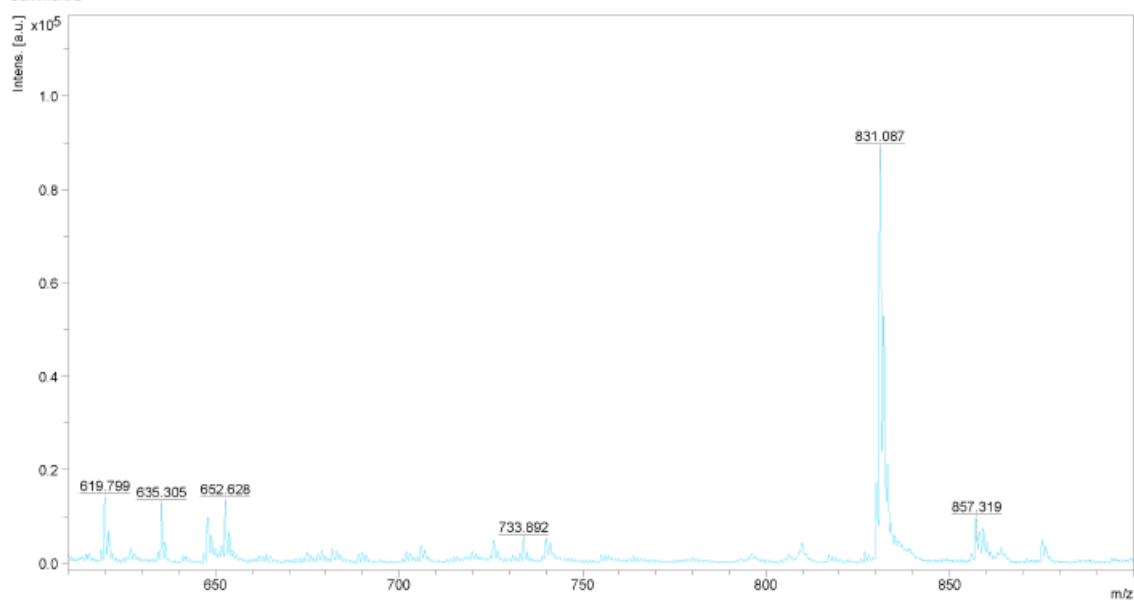

Mass spectrometry of TPSO-duple<sup>2-3,5</sup> (Intermediate II)

MALDI-TOF-MS: 590.946 [M + Na]<sup>+</sup>

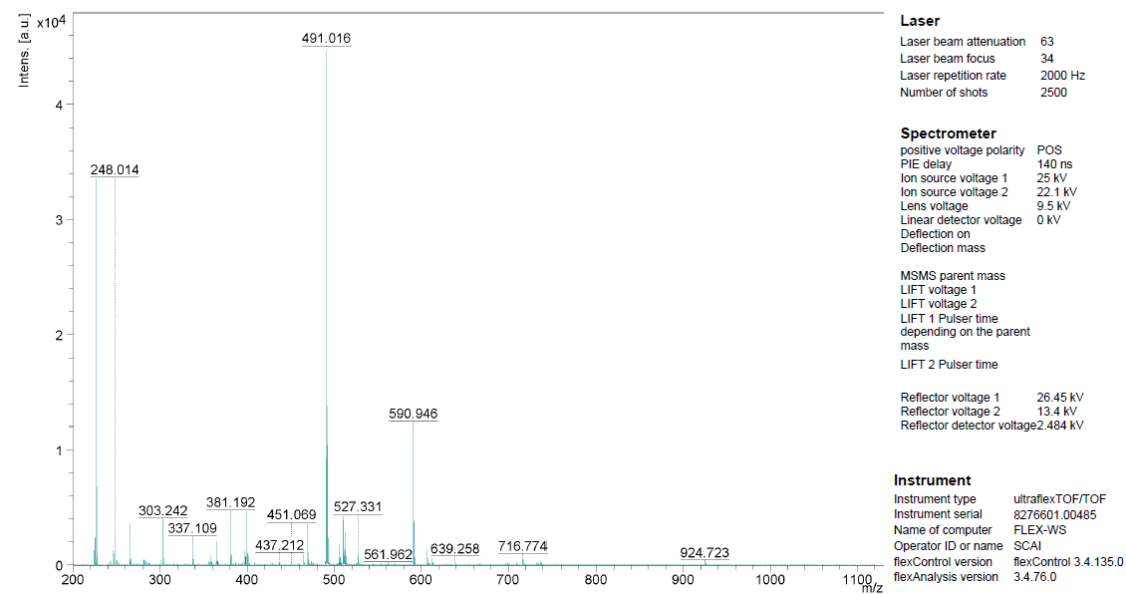

Mass spectrometry of Boc-duple<sup>1,2</sup>

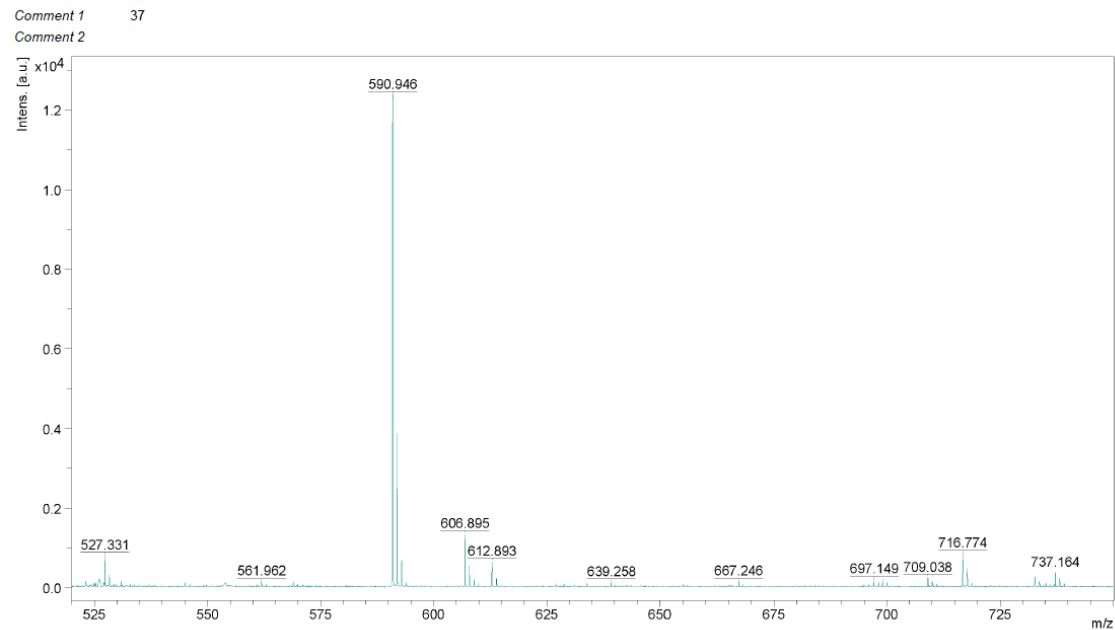

Mass spectrometry of Boc-duple<sup>1,2</sup> (scaled up)
